# Supplementary material for: Asymmetric total synthesis of (+)-O-methylasparvenone, a rare nitrogen-free serotonin 2C receptor antagonist
Source: Royal Society of Chemistry journal article supplement (doi:10.1039/c6ob01678b), 2016-01-01
Supplement: c6ob01678b1.pdf [file c6ob01678b1.pdf]

## **ELECTRONIC SUPPLEMENTARY INFORMATION**

### **Asymmetric total synthesis of (+)-*O*-methylasparvenone, a rare nitrogen-free serotonin 2C receptor antagonist<sup>†</sup>**

Raphael Lafleur-Lambert and John Boukouvalas\*

<sup>†</sup>*Department of Chemistry, Pavillon Alexandre-Vachon, Université Laval, 1045 Avenue de la  
Médecine, Quebec City, Quebec G1V 0A6, Canada*

E-mail: [john.boukouvalas@chm.ulaval.ca](mailto:john.boukouvalas@chm.ulaval.ca)

## Table of Contents

|                                                                                                                                                                                            |     |
|--------------------------------------------------------------------------------------------------------------------------------------------------------------------------------------------|-----|
| <sup>1</sup> H NMR (400 Mhz, CDCl <sub>3</sub> ) of 4-ethyl-3,5-dimethoxybenzaldehyde ( <b>4</b> ) .....                                                                                   | S3  |
| <sup>13</sup> C NMR (100 Mhz, CDCl <sub>3</sub> ) of 4-ethyl-3,5-dimethoxybenzaldehyde ( <b>4</b> ) .....                                                                                  | S4  |
| <sup>1</sup> H NMR (500 Mhz, CDCl <sub>3</sub> ) of ( <i>R</i> )-methyl 4-(4-ethyl-3,5-dimethoxyphenyl)-4-hydroxybut-2-ynoate ( <b>5</b> ) .....                                           | S5  |
| <sup>13</sup> C NMR (125 Mhz, CDCl <sub>3</sub> ) of ( <i>R</i> )-methyl 4-(4-ethyl-3,5-dimethoxyphenyl)-4-hydroxybut-2-ynoate ( <b>5</b> ) .....                                          | S6  |
| <sup>1</sup> H NMR (500 Mhz, CDCl <sub>3</sub> ) of ( <i>R</i> )-methyl 4-(( <i>tert</i> -butyldiphenylsilyl)oxy)-4-(4-ethyl-3,5-dimethoxyphenyl)but-2-ynoate ( <b>6</b> ) .....           | S7  |
| <sup>13</sup> C NMR (125 Mhz, CDCl <sub>3</sub> ) of ( <i>R</i> )-methyl 4-(( <i>tert</i> -butyldiphenylsilyl)oxy)-4-(4-ethyl-3,5-dimethoxyphenyl)but-2-ynoate ( <b>6</b> ) .....          | S8  |
| <sup>1</sup> H NMR (500 Mhz, CDCl <sub>3</sub> ) of ( <i>S</i> )-methyl 4-(( <i>tert</i> -butyldiphenylsilyl)oxy)-4-(4-ethyl-3,5-dimethoxyphenyl)butanoate ( <b>7</b> ) .....              | S9  |
| <sup>13</sup> C NMR (125 Mhz, CDCl <sub>3</sub> ) of ( <i>S</i> )-methyl 4-(( <i>tert</i> -butyldiphenylsilyl)oxy)-4-(4-ethyl-3,5-dimethoxyphenyl)butanoate ( <b>7</b> ) .....             | S10 |
| <sup>1</sup> H NMR (500 Mhz, CDCl <sub>3</sub> ) of ( <i>S</i> )-4-(( <i>tert</i> -butyldiphenylsilyl)oxy)-4-(4-ethyl-3,5-dimethoxyphenyl)butanoic acid ( <b>8</b> ) .....                 | S11 |
| <sup>13</sup> C NMR (125 Mhz, CDCl <sub>3</sub> ) of ( <i>S</i> )-4-(( <i>tert</i> -butyldiphenylsilyl)oxy)-4-(4-ethyl-3,5-dimethoxyphenyl)butanoic acid ( <b>8</b> ) .....                | S12 |
| <sup>1</sup> H NMR (400 Mhz, CDCl <sub>3</sub> ) of ( <i>S</i> )-4-(( <i>tert</i> -butyldiphenylsilyl)oxy)-7-ethyl-6,8-dimethoxy-3,4-dihydronaphthalen-1(2H)-one ( <b>9</b> ) .....        | S13 |
| <sup>1</sup> H NMR (100 Mhz, CDCl <sub>3</sub> ) of ( <i>S</i> )-4-(( <i>tert</i> -butyldiphenylsilyl)oxy)-7-ethyl-6,8-dimethoxy-3,4-dihydronaphthalen-1(2H)-one ( <b>9</b> ) .....        | S14 |
| <sup>1</sup> H NMR (500 Mhz, CDCl <sub>3</sub> ) of ( <i>S</i> )-4-(( <i>tert</i> -butyldiphenylsilyl)oxy)-7-ethyl-8-hydroxy-6-methoxy-3,4-dihydronaphthalen-1(2H)-one ( <b>10</b> ) ..... | S15 |
| <sup>1</sup> H NMR (125 Mhz, CDCl <sub>3</sub> ) of ( <i>S</i> )-4-(( <i>tert</i> -butyldiphenylsilyl)oxy)-7-ethyl-8-hydroxy-6-methoxy-3,4-dihydronaphthalen-1(2H)-one ( <b>10</b> ) ..... | S16 |
| <sup>1</sup> H NMR (500 Mhz, CDCl <sub>3</sub> ) of (+)- <i>O</i> -Methylasparvenone ( <b>1a</b> ) .....                                                                                   | S17 |
| <sup>1</sup> H NMR (125 Mhz, CDCl <sub>3</sub> ) of (+)- <i>O</i> -Methylasparvenone ( <b>1a</b> ) .....                                                                                   | S18 |
| HPLC traces .....                                                                                                                                                                          | S19 |

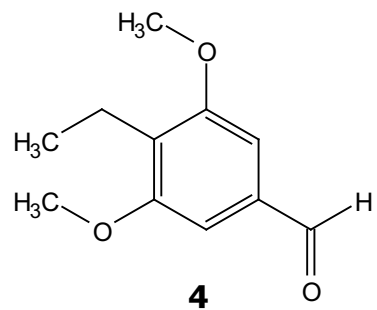

$^1\text{H}$  NMR (400 MHz,  $\text{CDCl}_3$ )

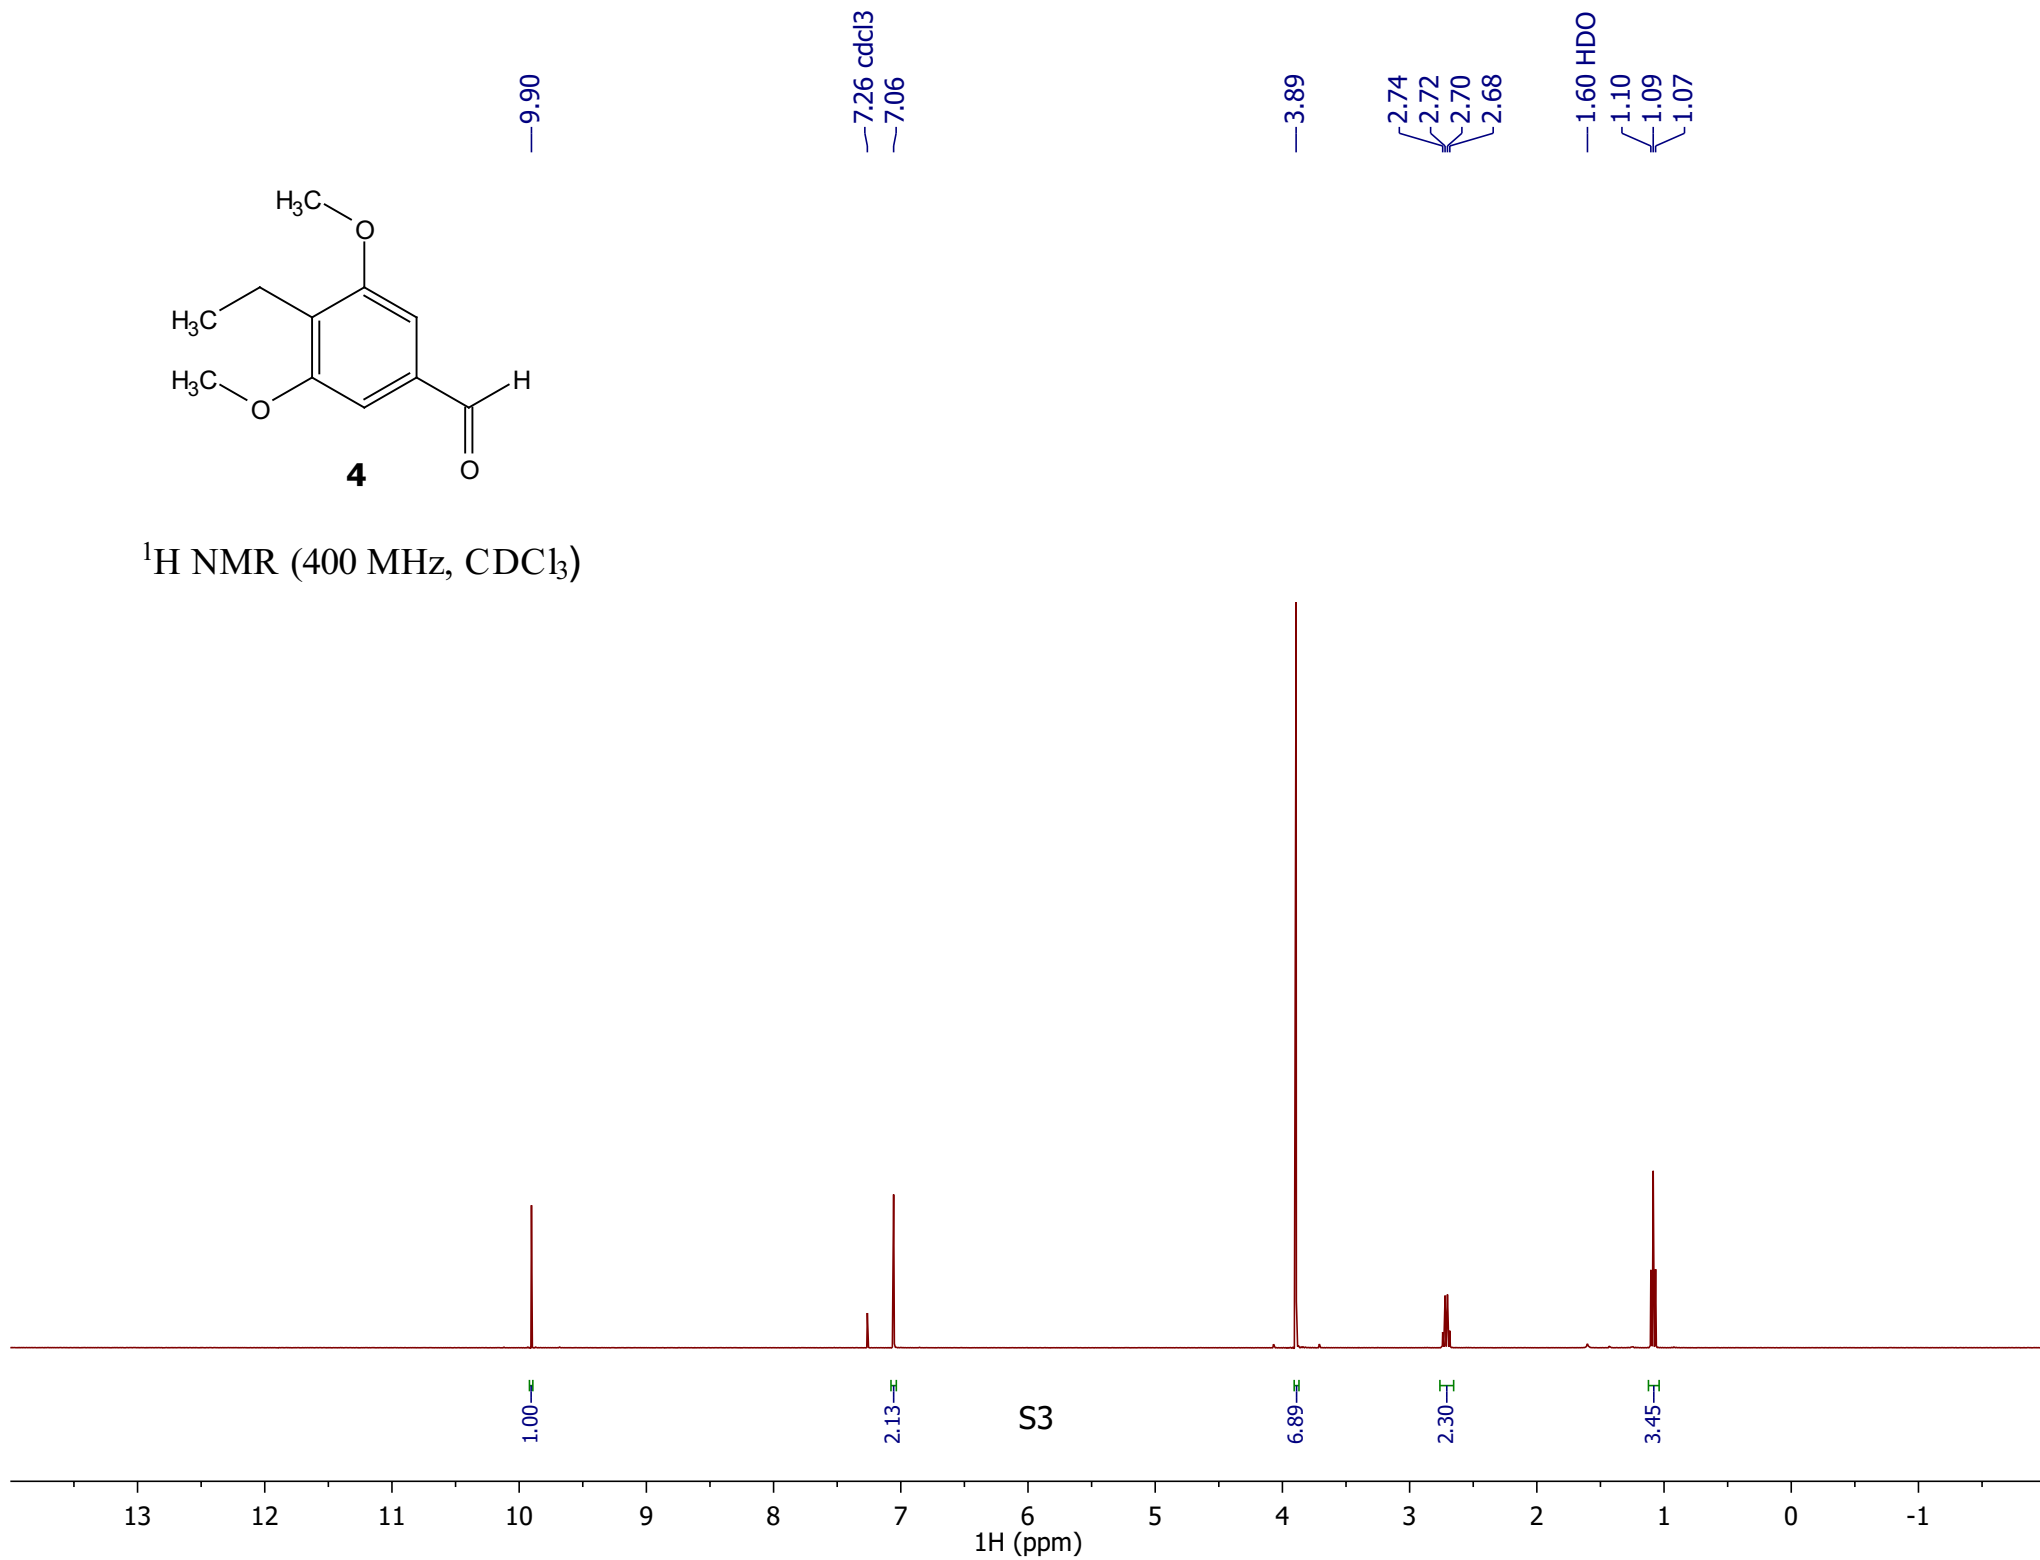

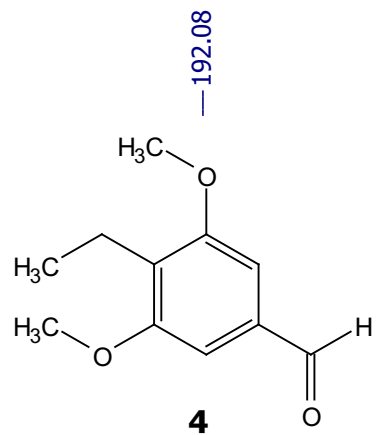

$^{13}\text{C}$  NMR (100 MHz,  $\text{CDCl}_3$ )

—192.08

—158.53

—135.28

—128.71

—105.04

77.48  $\text{cdCl}_3$   
77.16  $\text{cdCl}_3$   
76.84  $\text{cdCl}_3$

—56.01

—17.03

—13.35

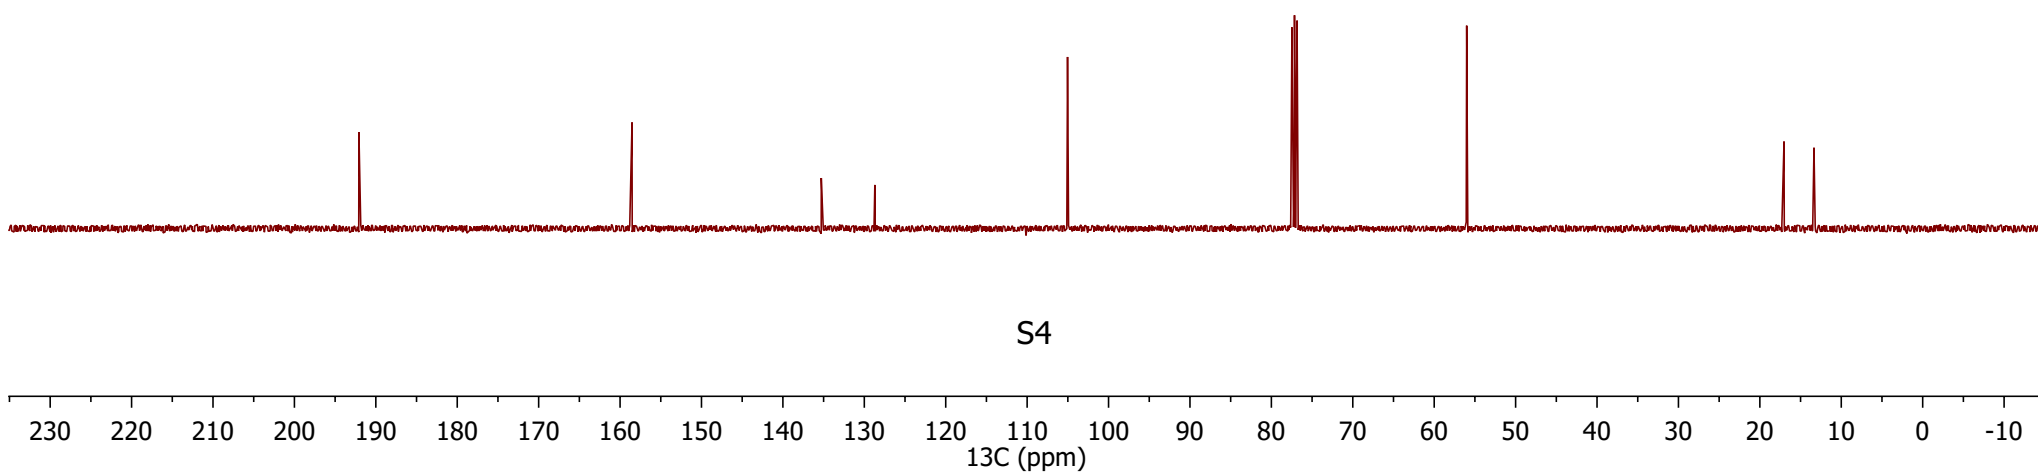

S4

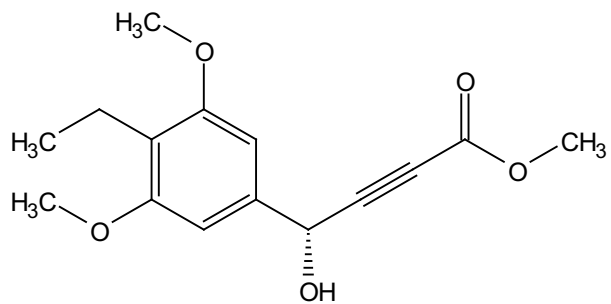

**5**

$^1\text{H}$  NMR (500 MHz,  $\text{CDCl}_3$ )

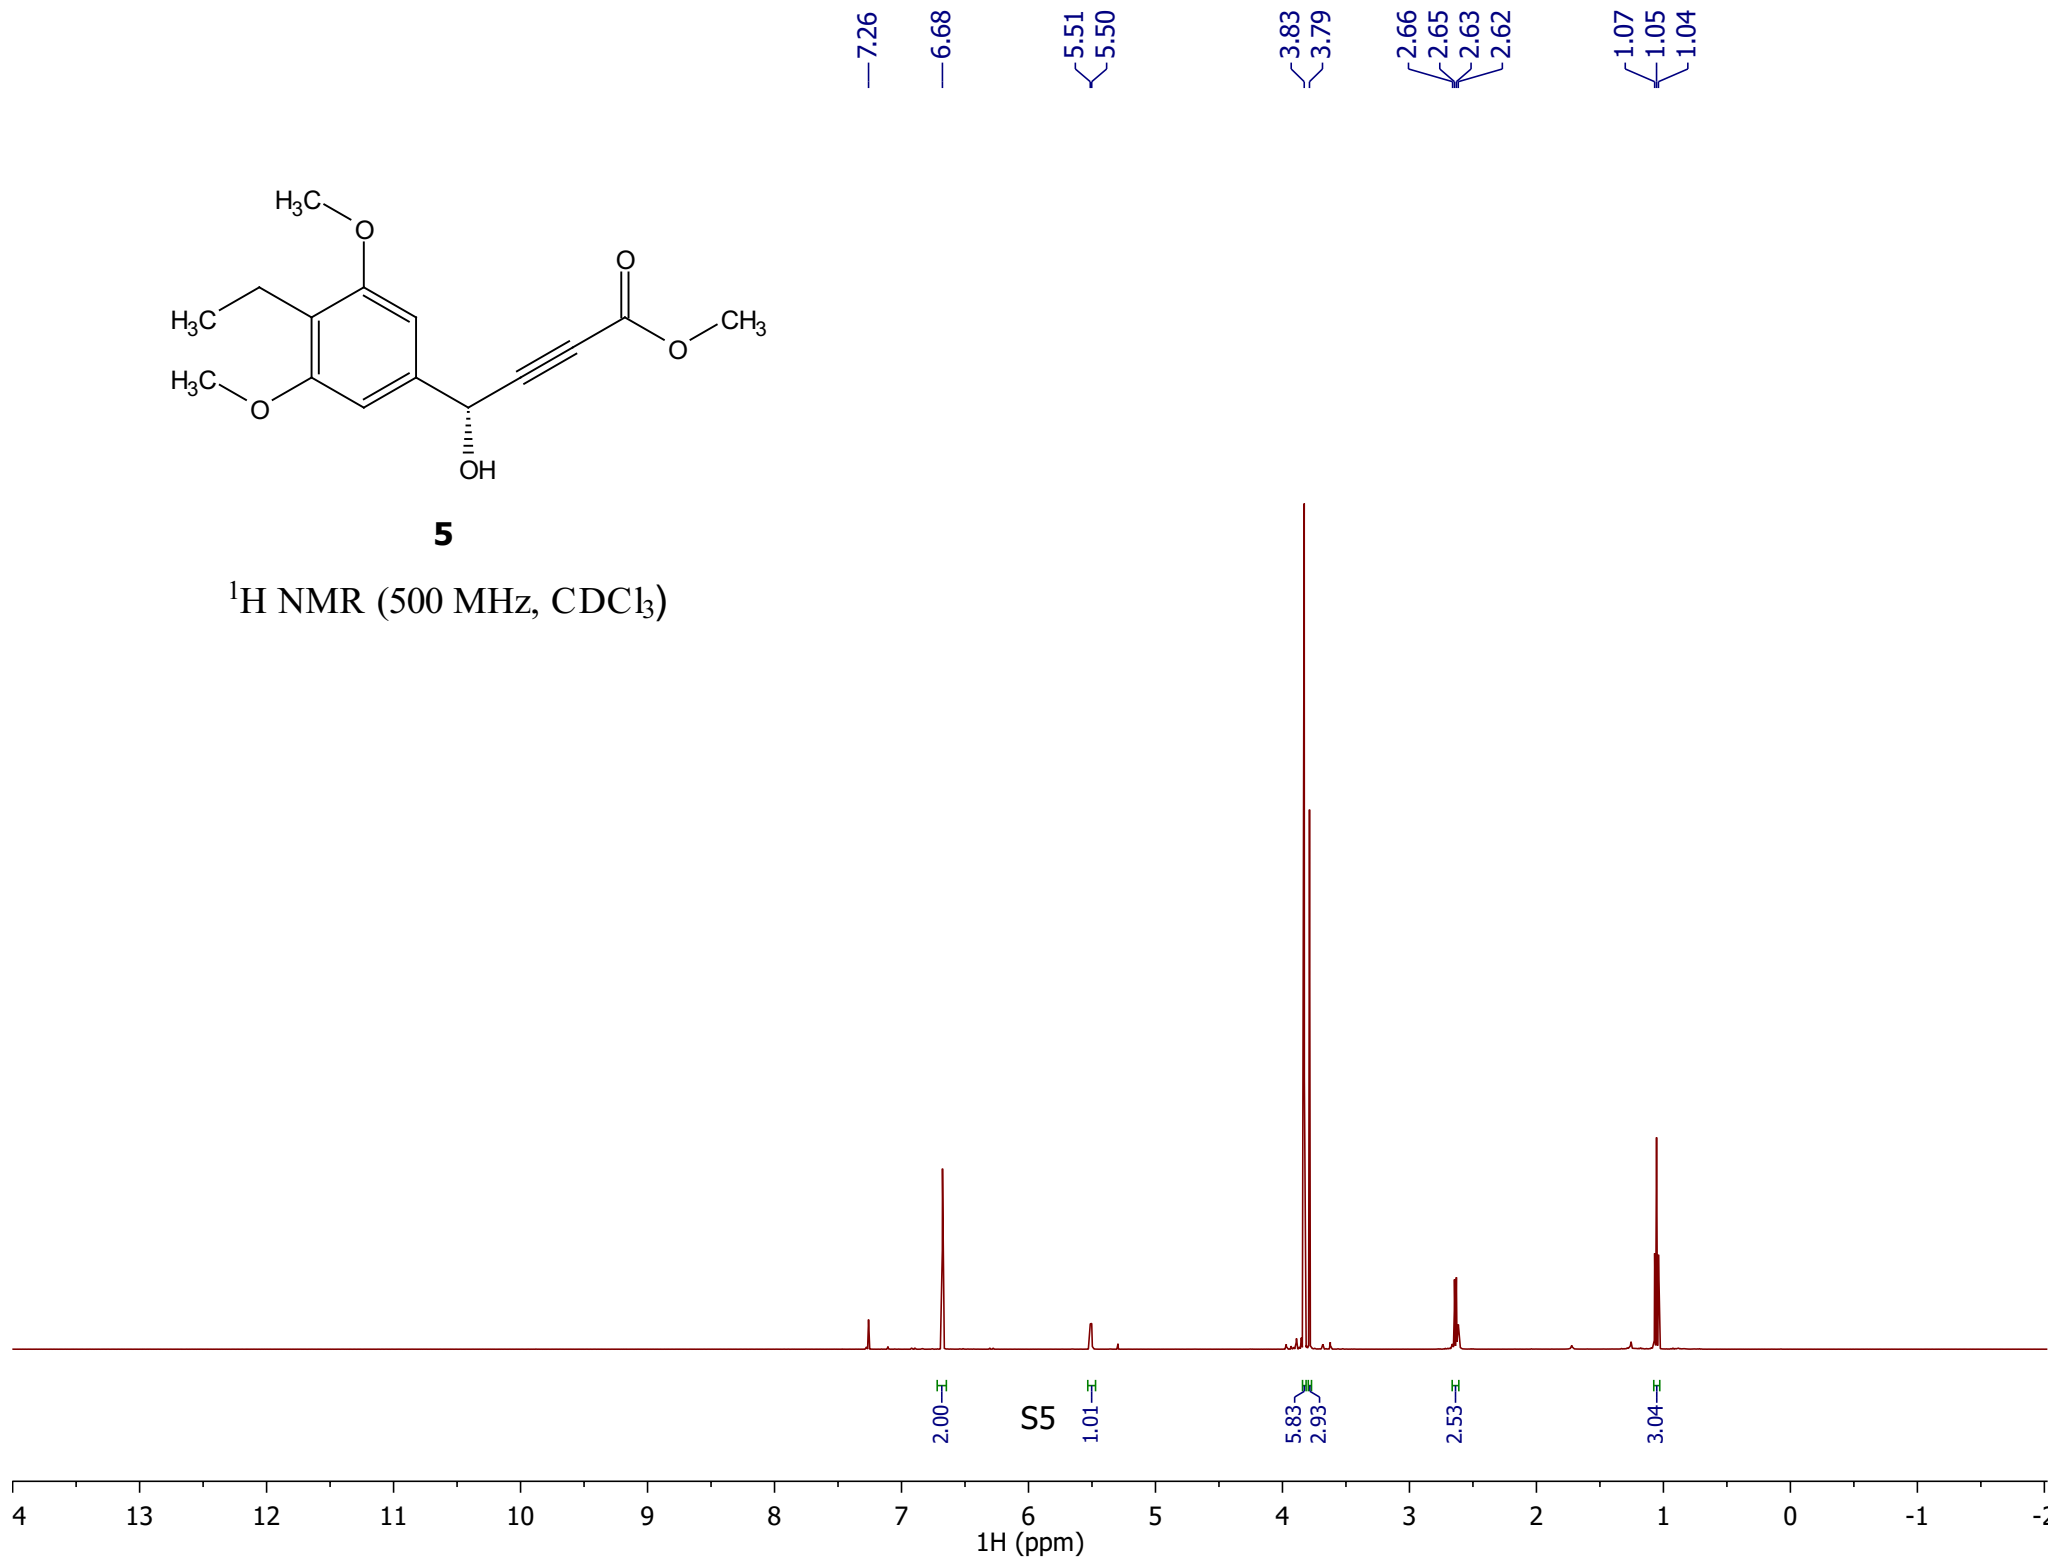



**5**

$^{13}\text{C}$  NMR (125 MHz,  $\text{CDCl}_3$ )

—158.38

—153.90

—137.14

—121.76

—102.26

—86.76

77.54

77.41  $\text{cdCl}_3$

77.36

77.16  $\text{cdCl}_3$

76.91  $\text{cdCl}_3$

64.79

55.94

53.03

—29.83

—16.43

—13.72

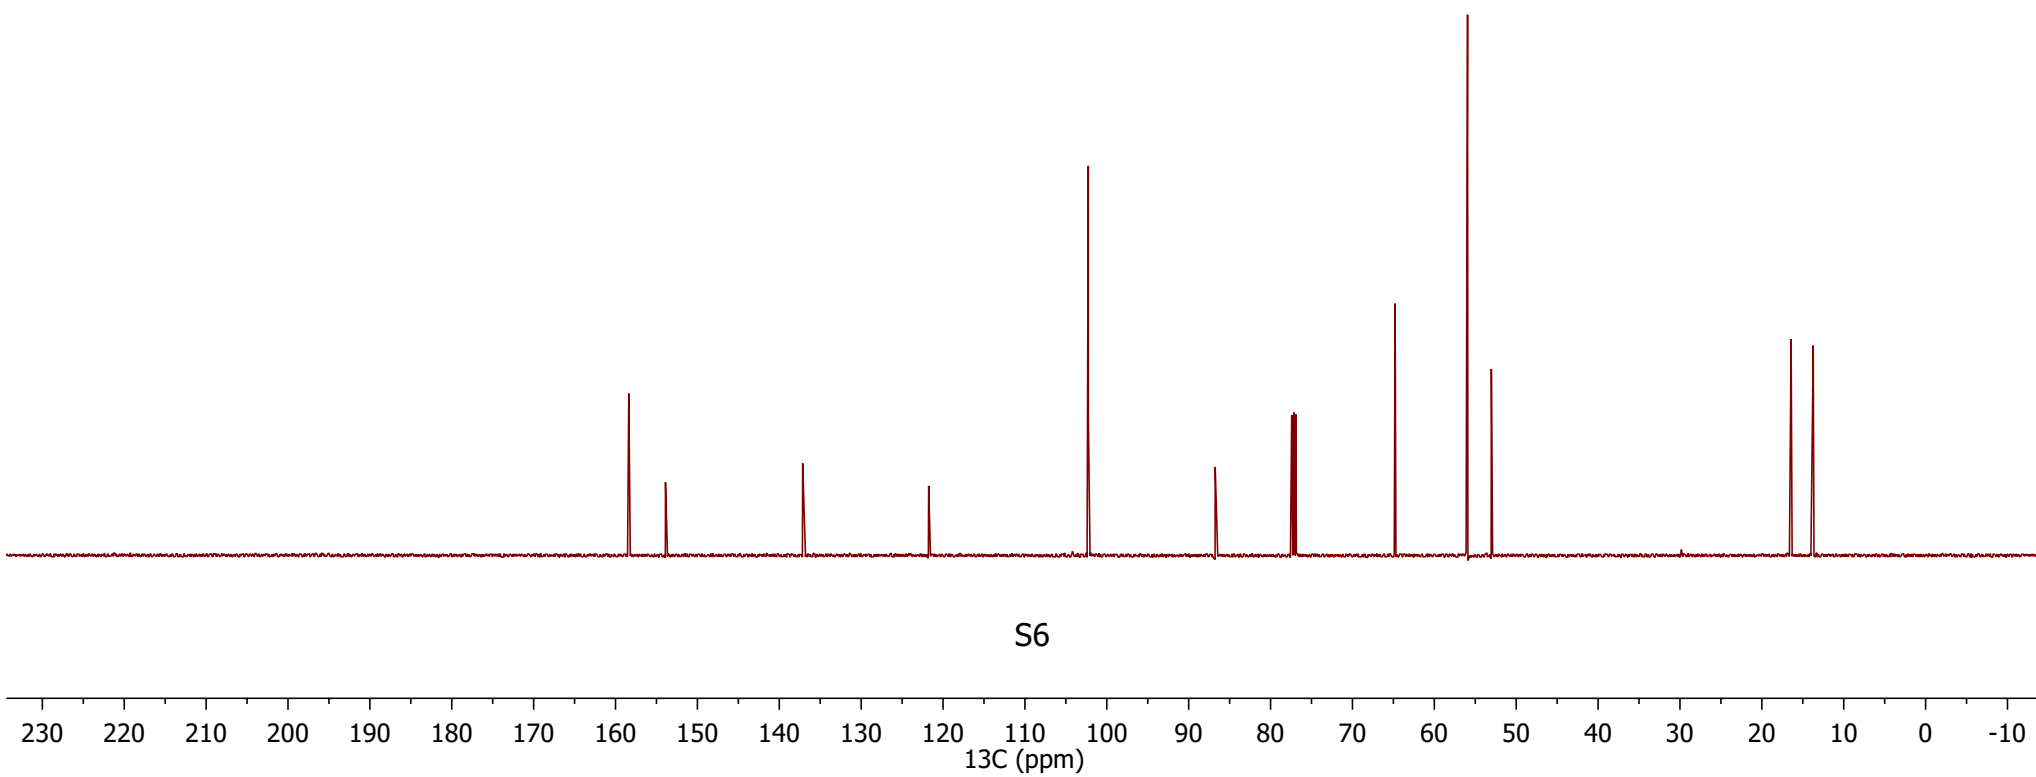

S6

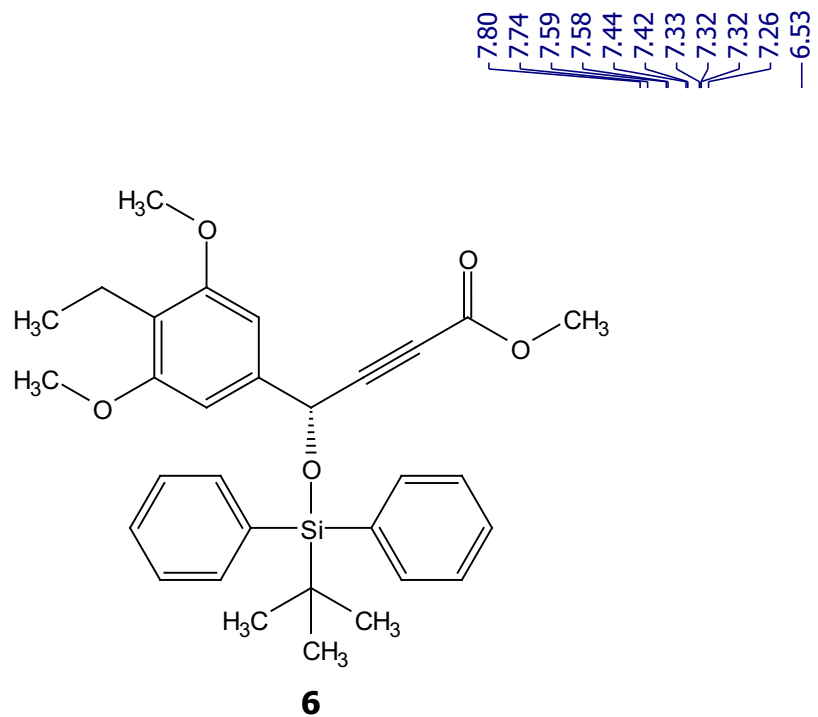

$^1\text{H}$  NMR (500 MHz,  $\text{CDCl}_3$ )

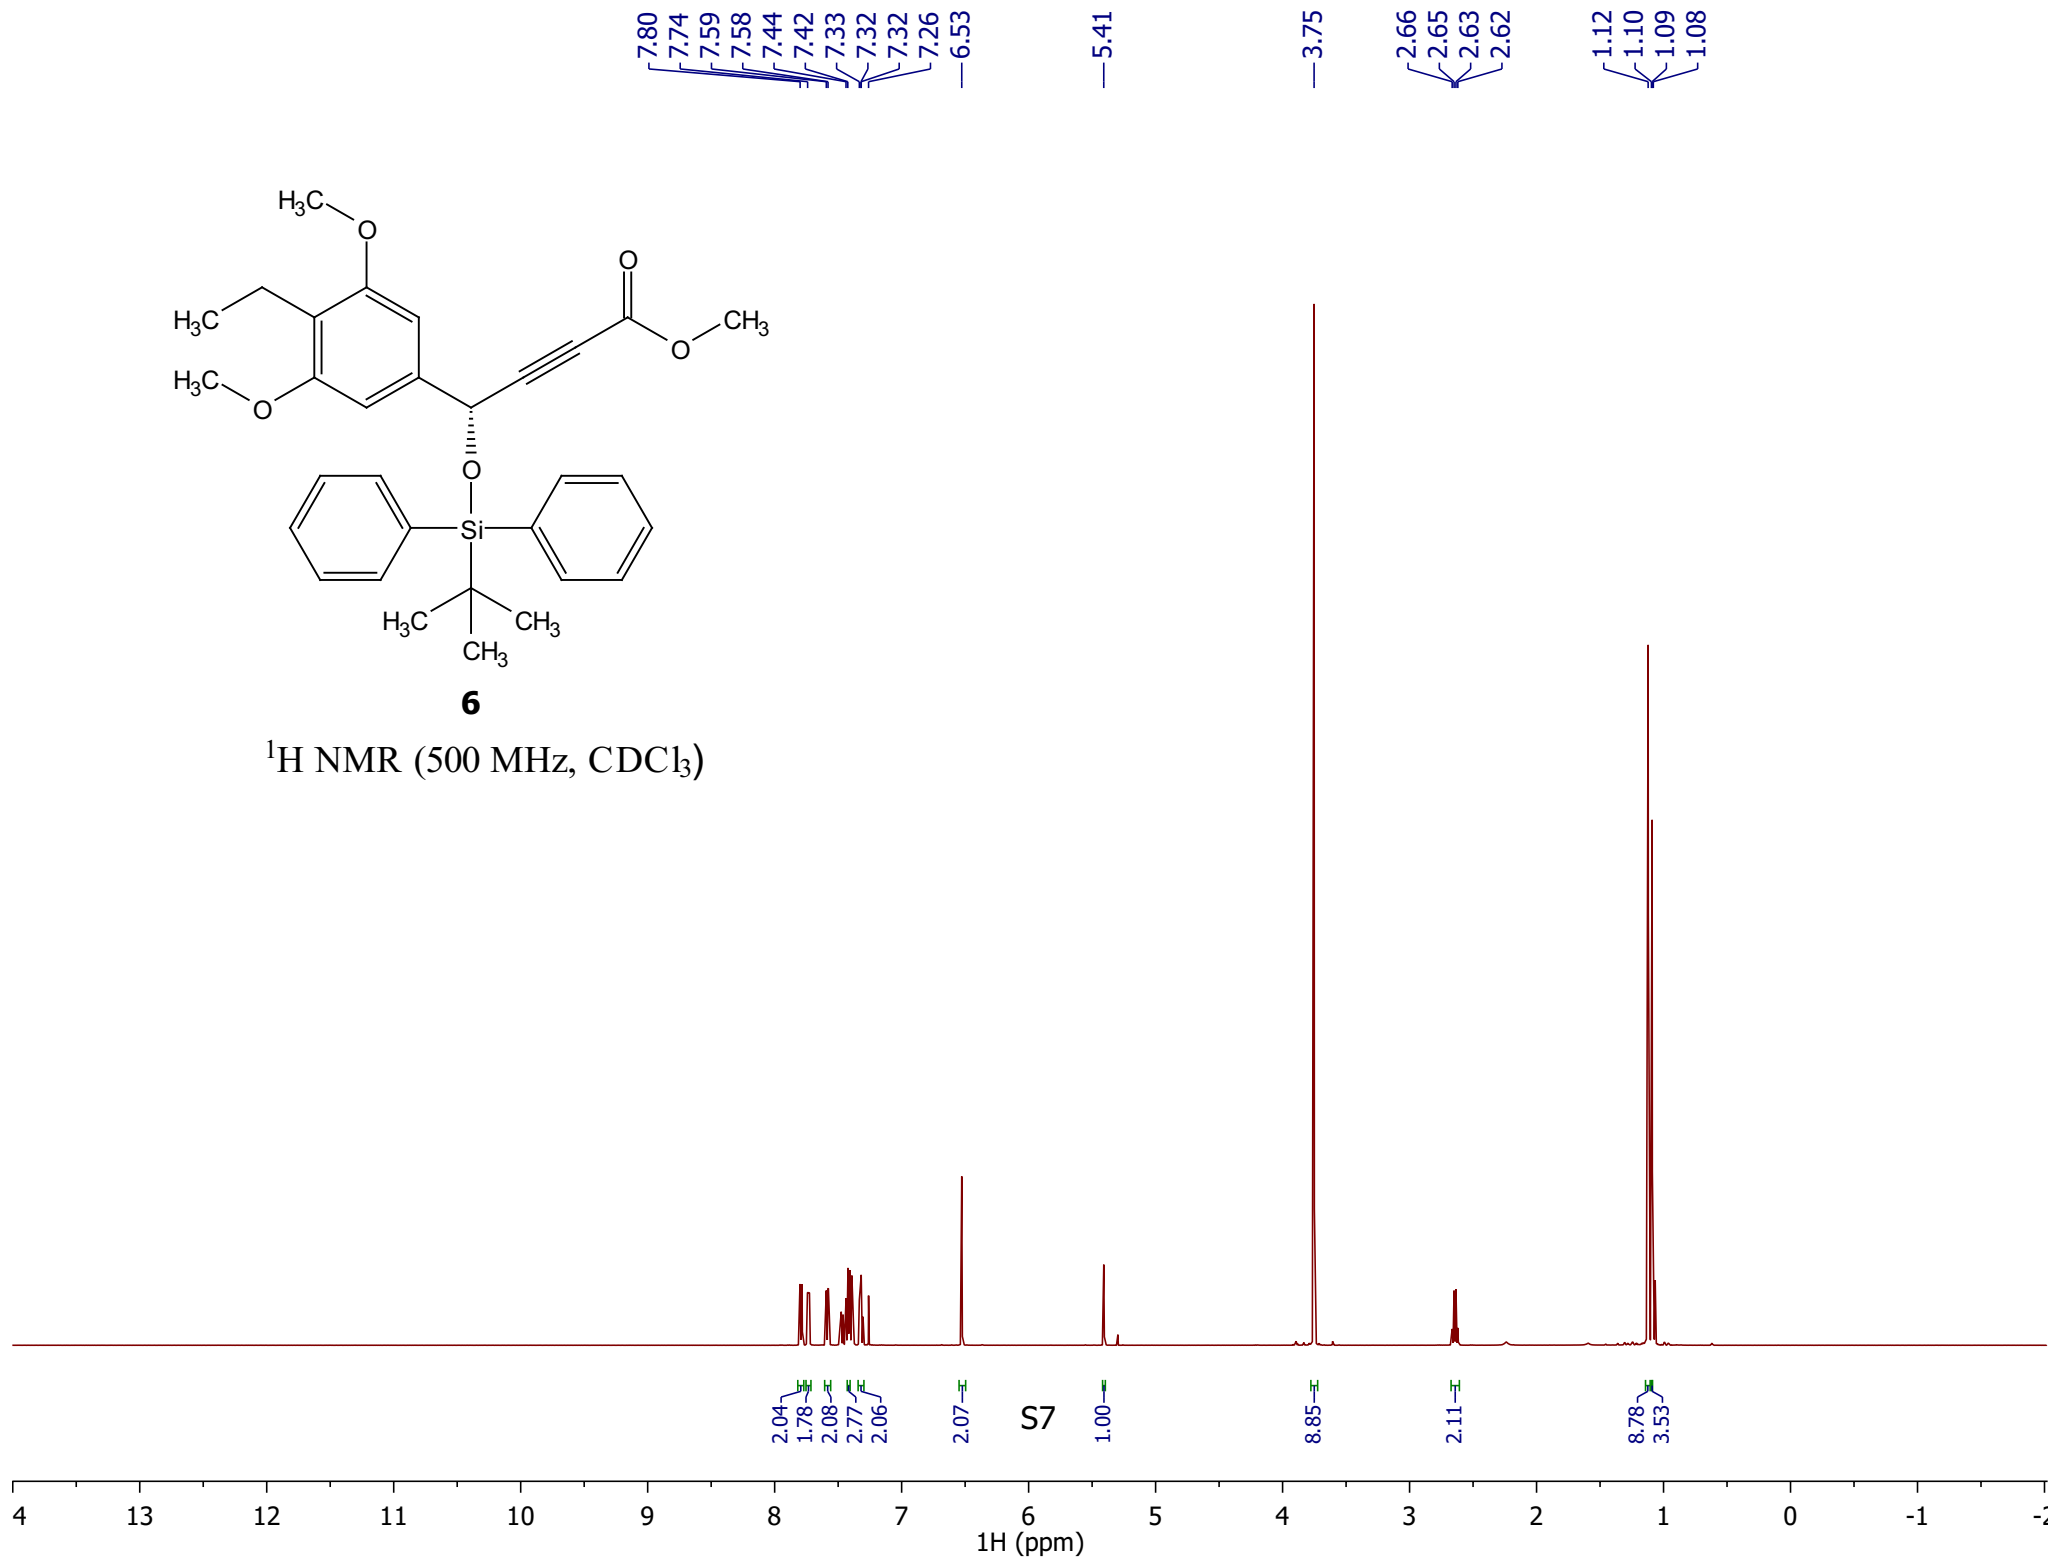

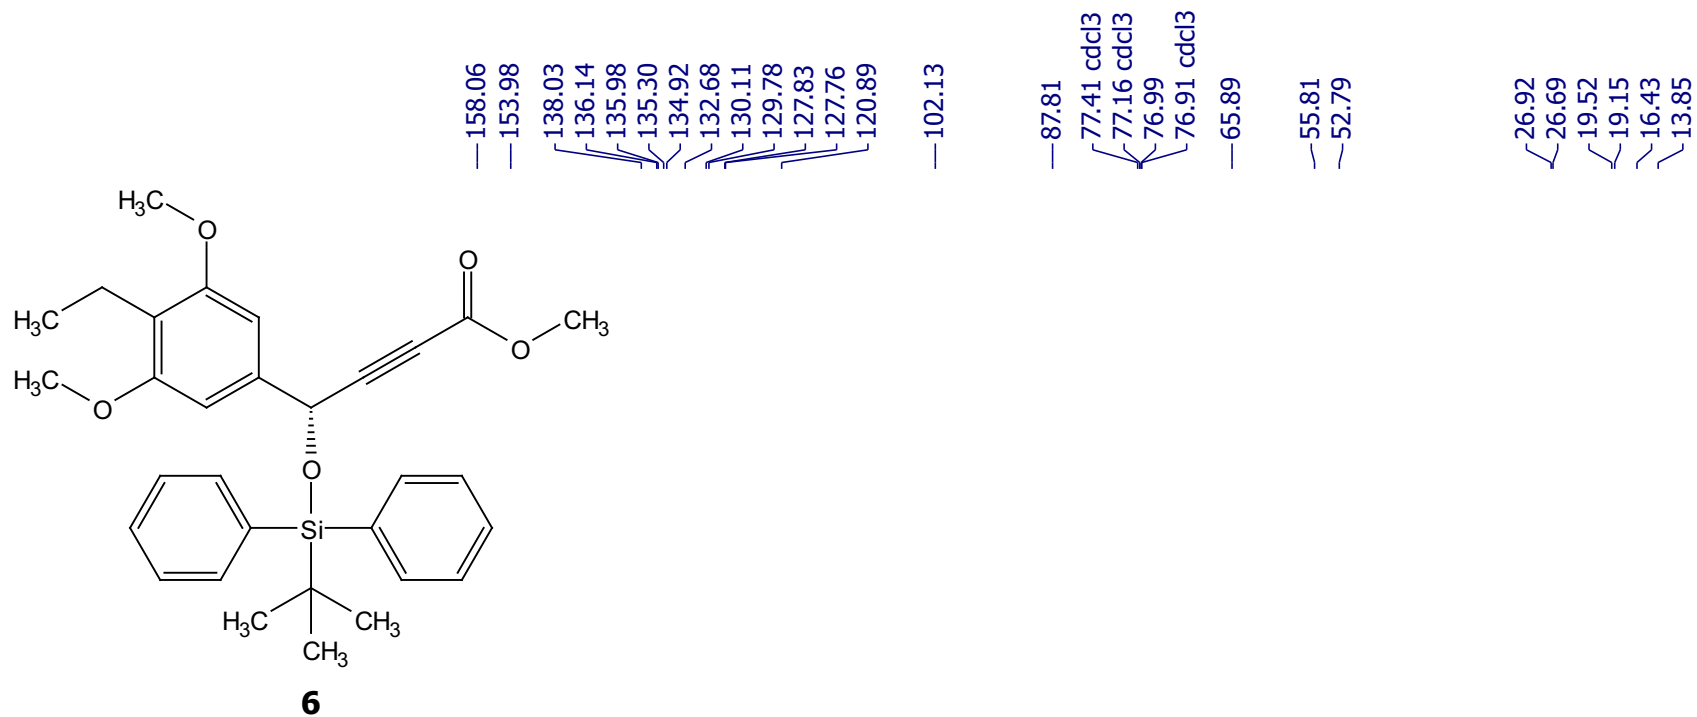

$^{13}\text{C}$  NMR (125 MHz,  $\text{CDCl}_3$ )

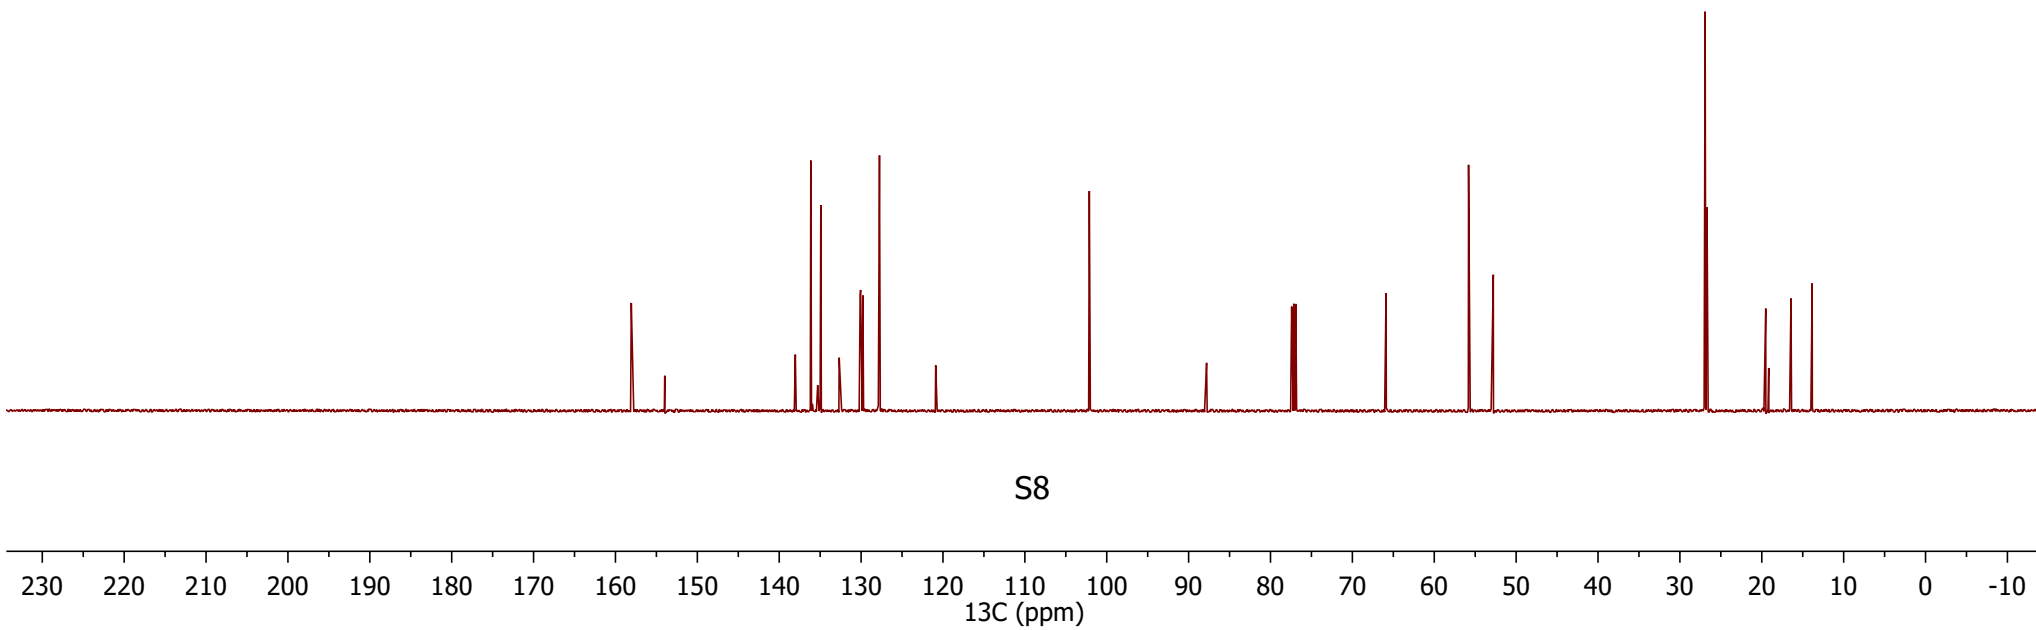



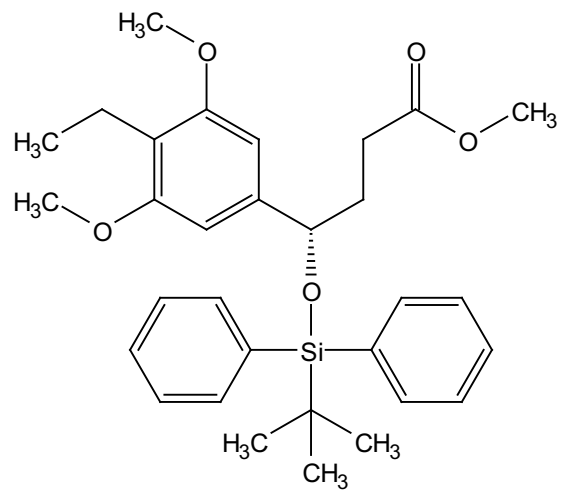

**7**

$^1\text{H}$  NMR (500 MHz,  $\text{CDCl}_3$ )

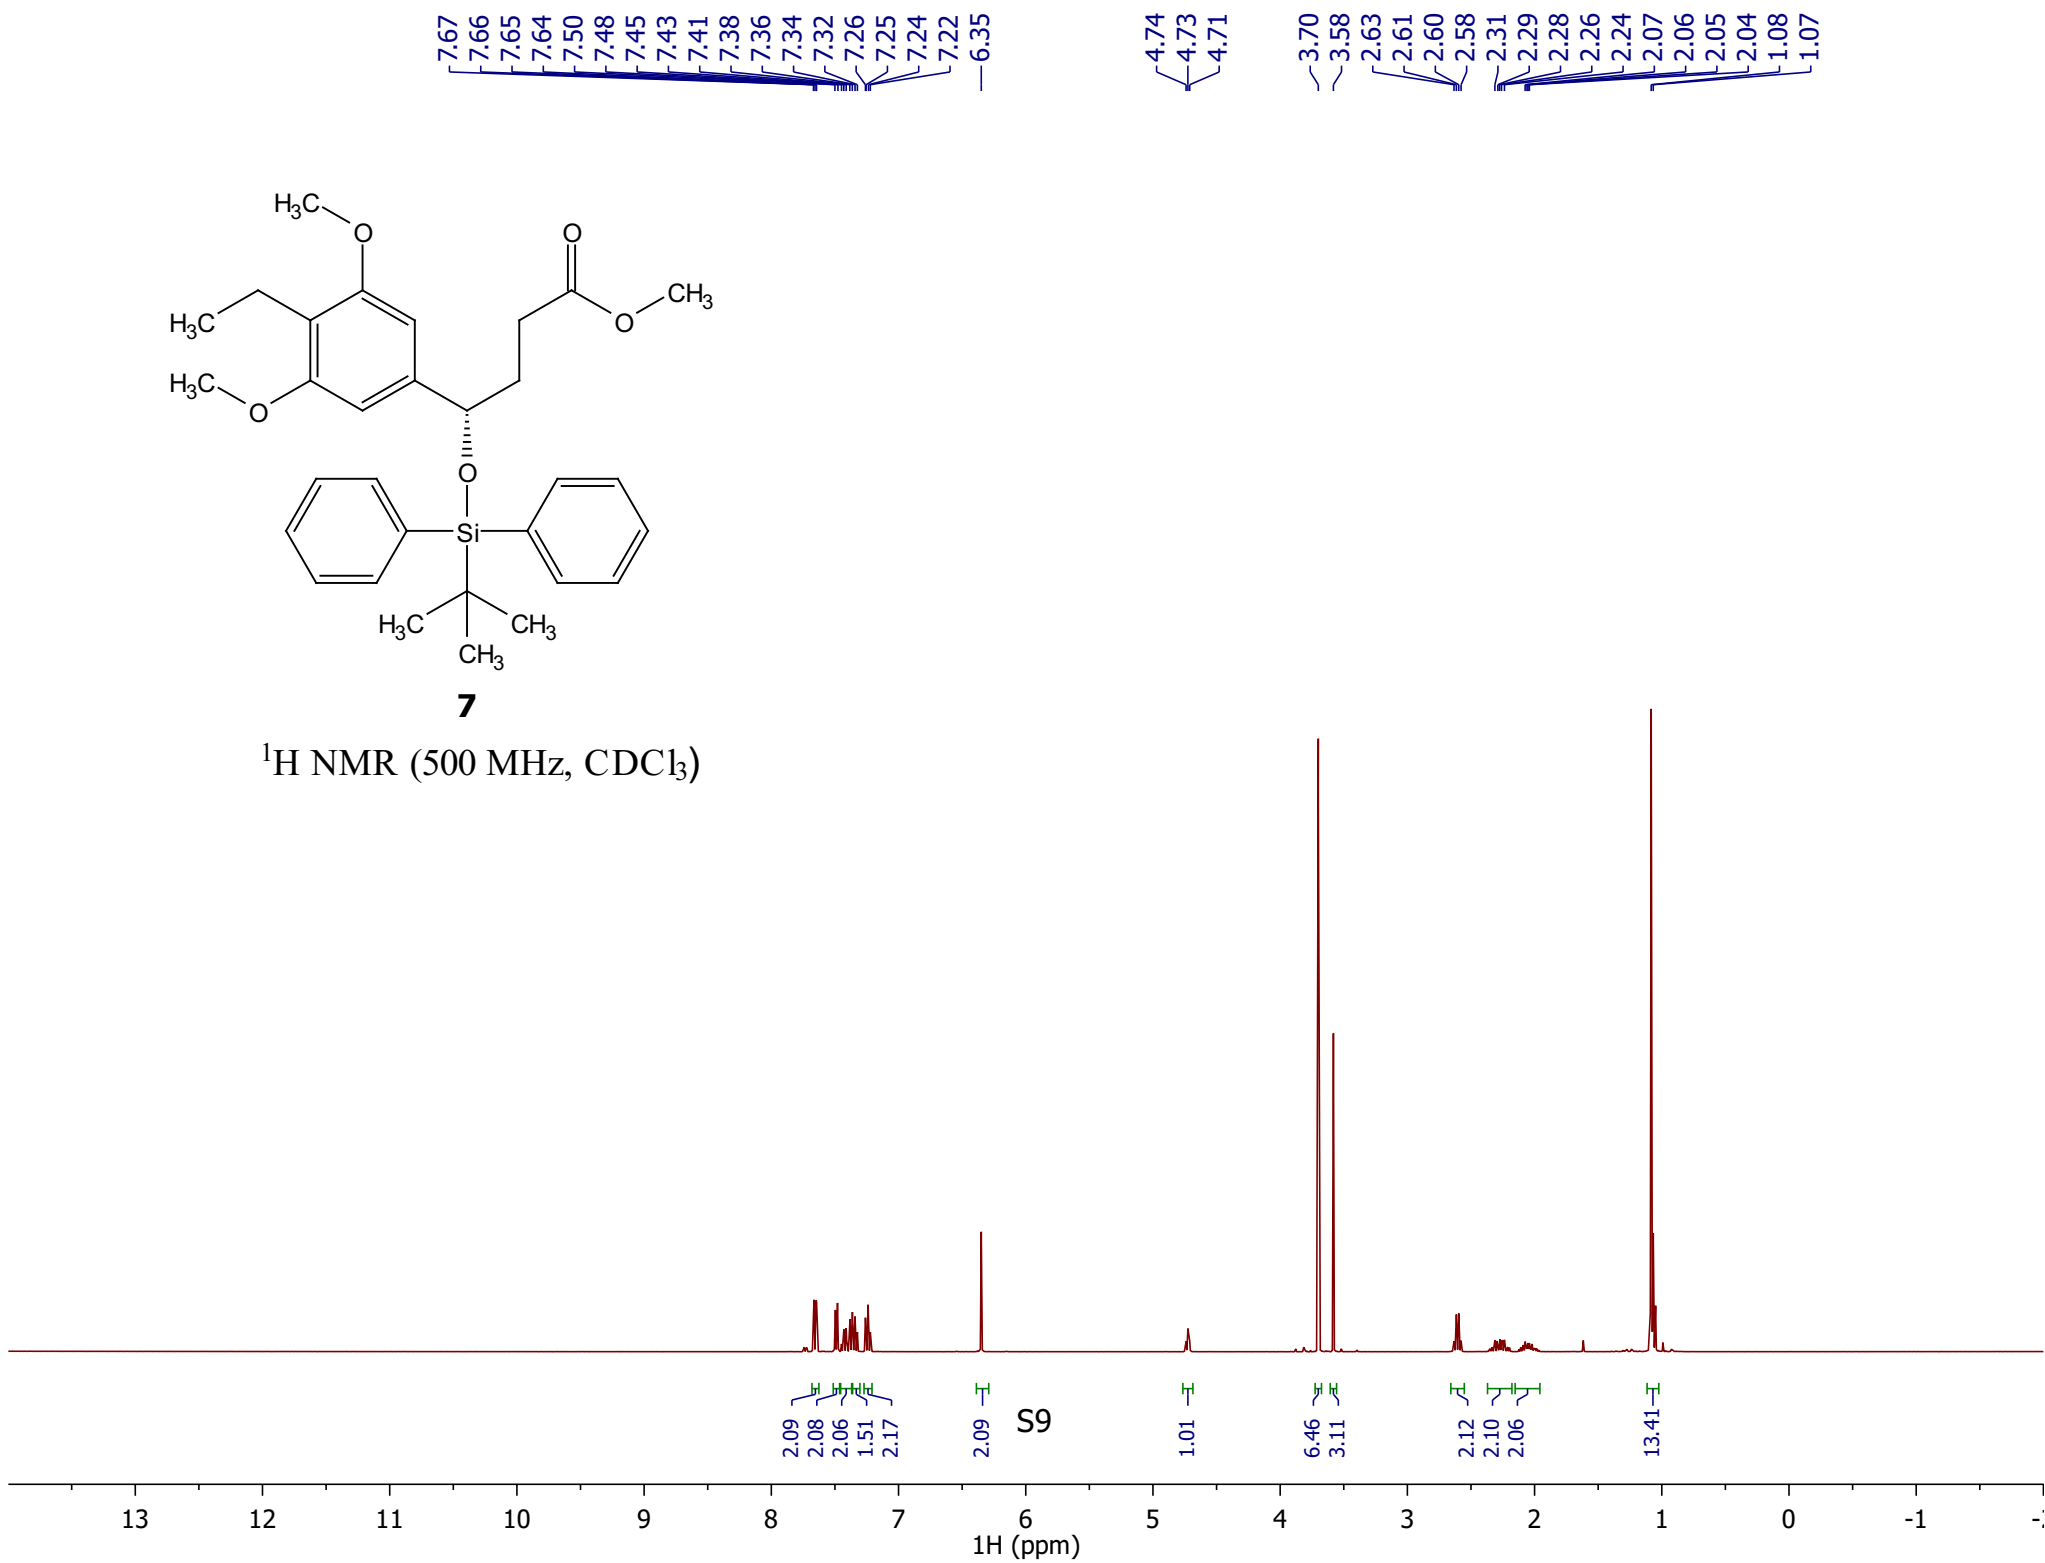

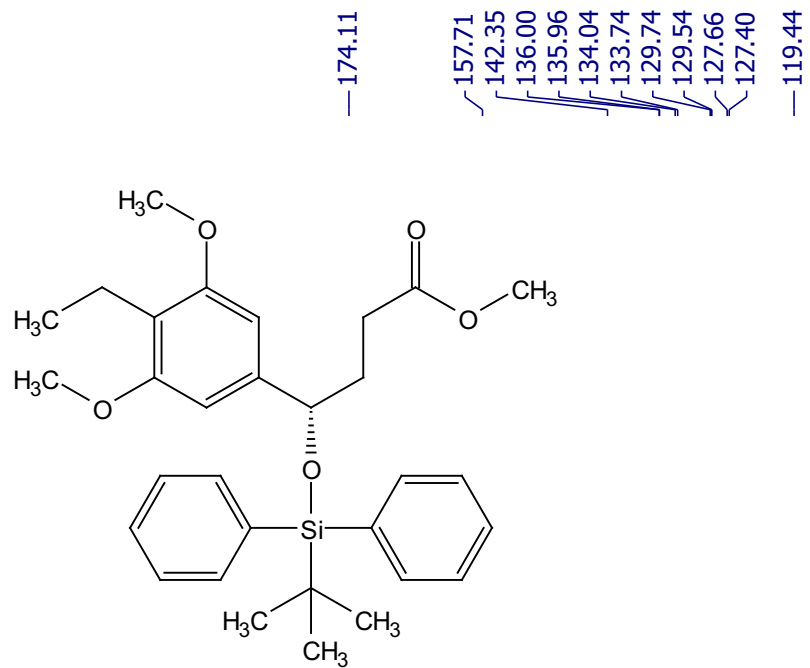

**7**

$^{13}\text{C}$  NMR (125 MHz,  $\text{CDCl}_3$ )

— 174.11  
 — 157.71  
 — 142.35  
 — 136.00  
 — 135.96  
 — 134.04  
 — 133.74  
 — 129.74  
 — 129.54  
 — 127.66  
 — 127.40  
 — 119.44

— 101.98

— 77.48  
 — 77.16  
 — 76.84  
 — 75.15

— 55.70  
 — 51.57

— 34.89  
 — 29.66  
 — 27.14  
 — 19.54  
 — 16.36  
 — 14.03

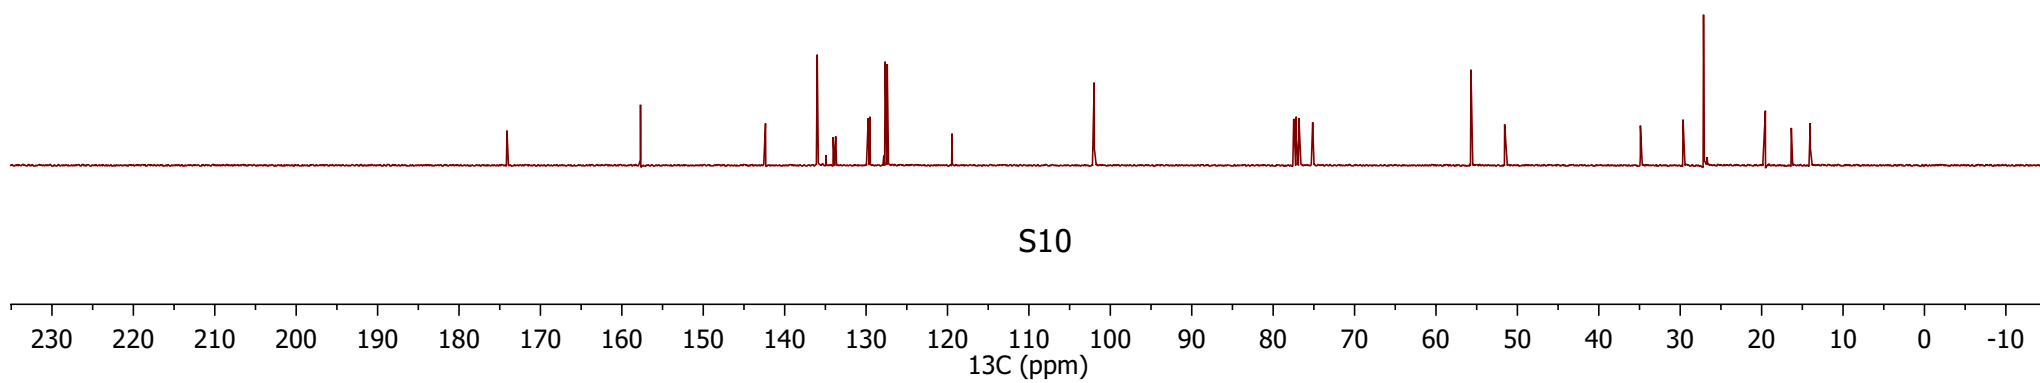

S10

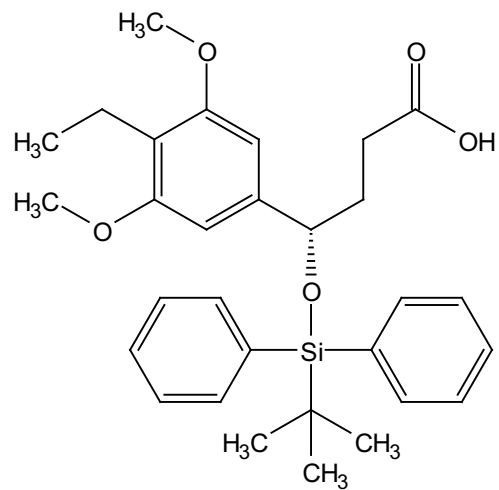

**8**

$^1\text{H NMR}$  (500 MHz,  $\text{CDCl}_3$ )

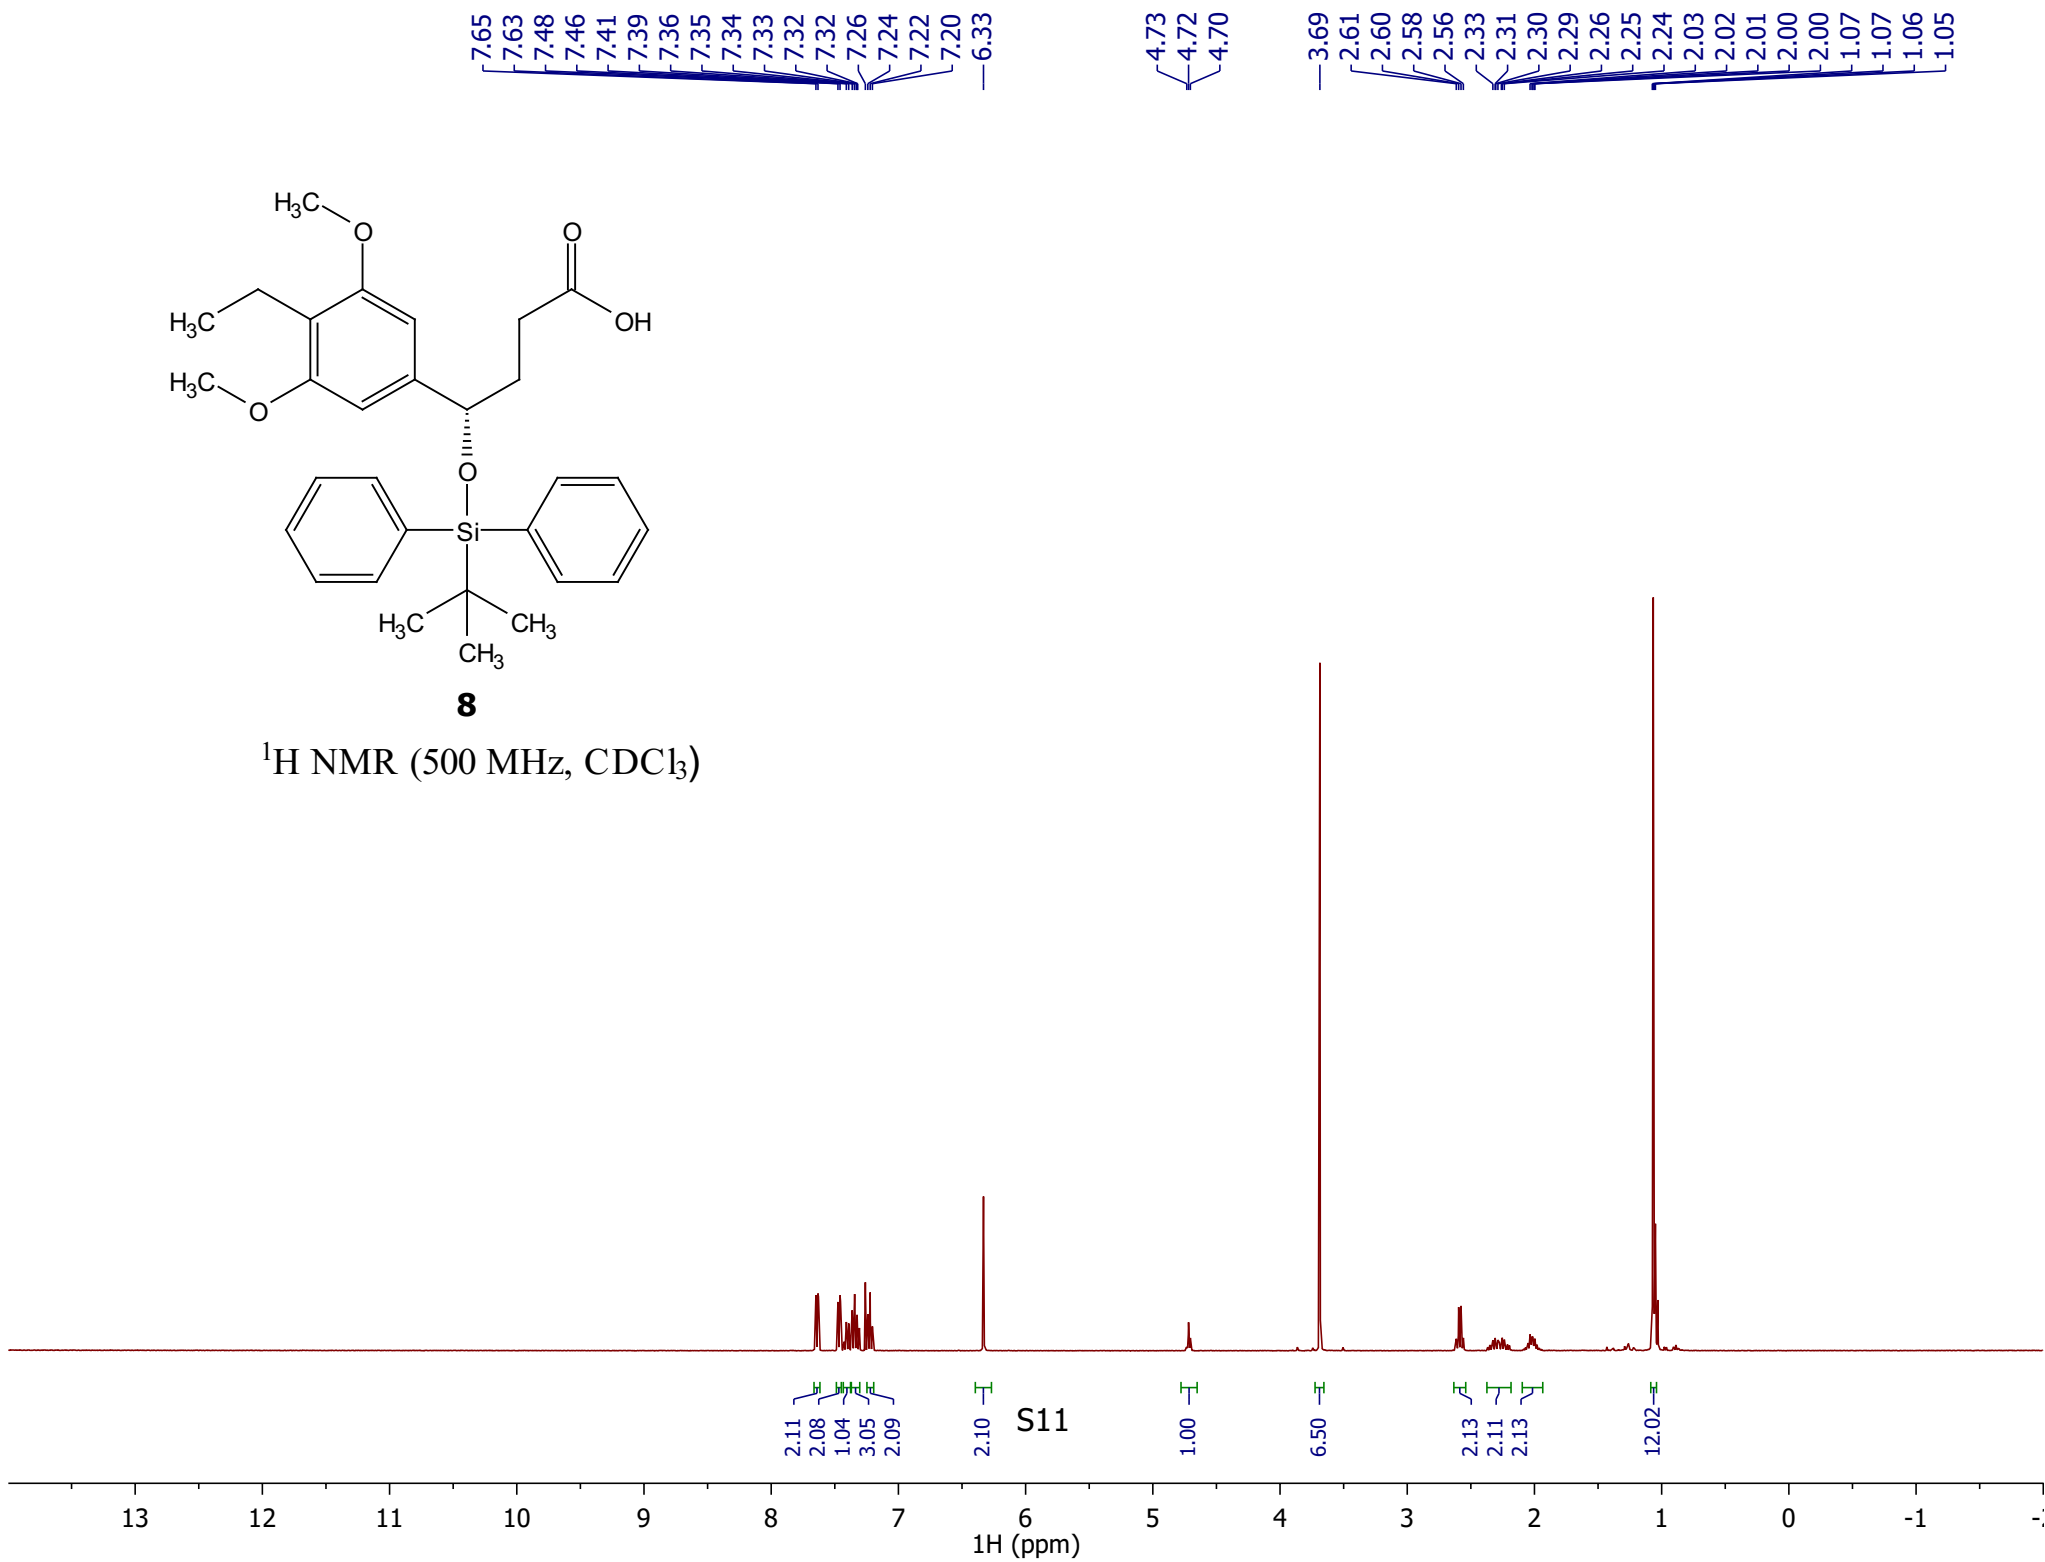

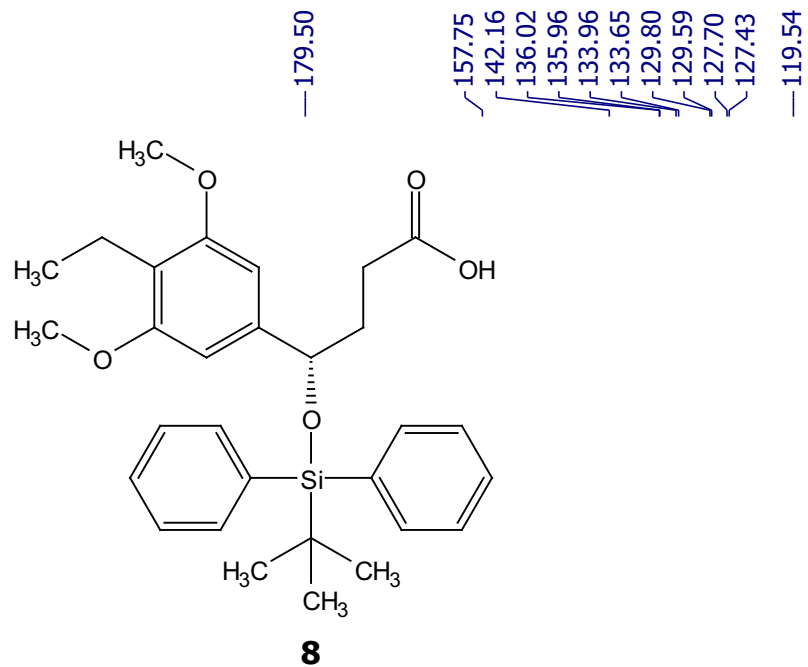

$^{13}\text{C}$  NMR (125 MHz,  $\text{CDCl}_3$ )

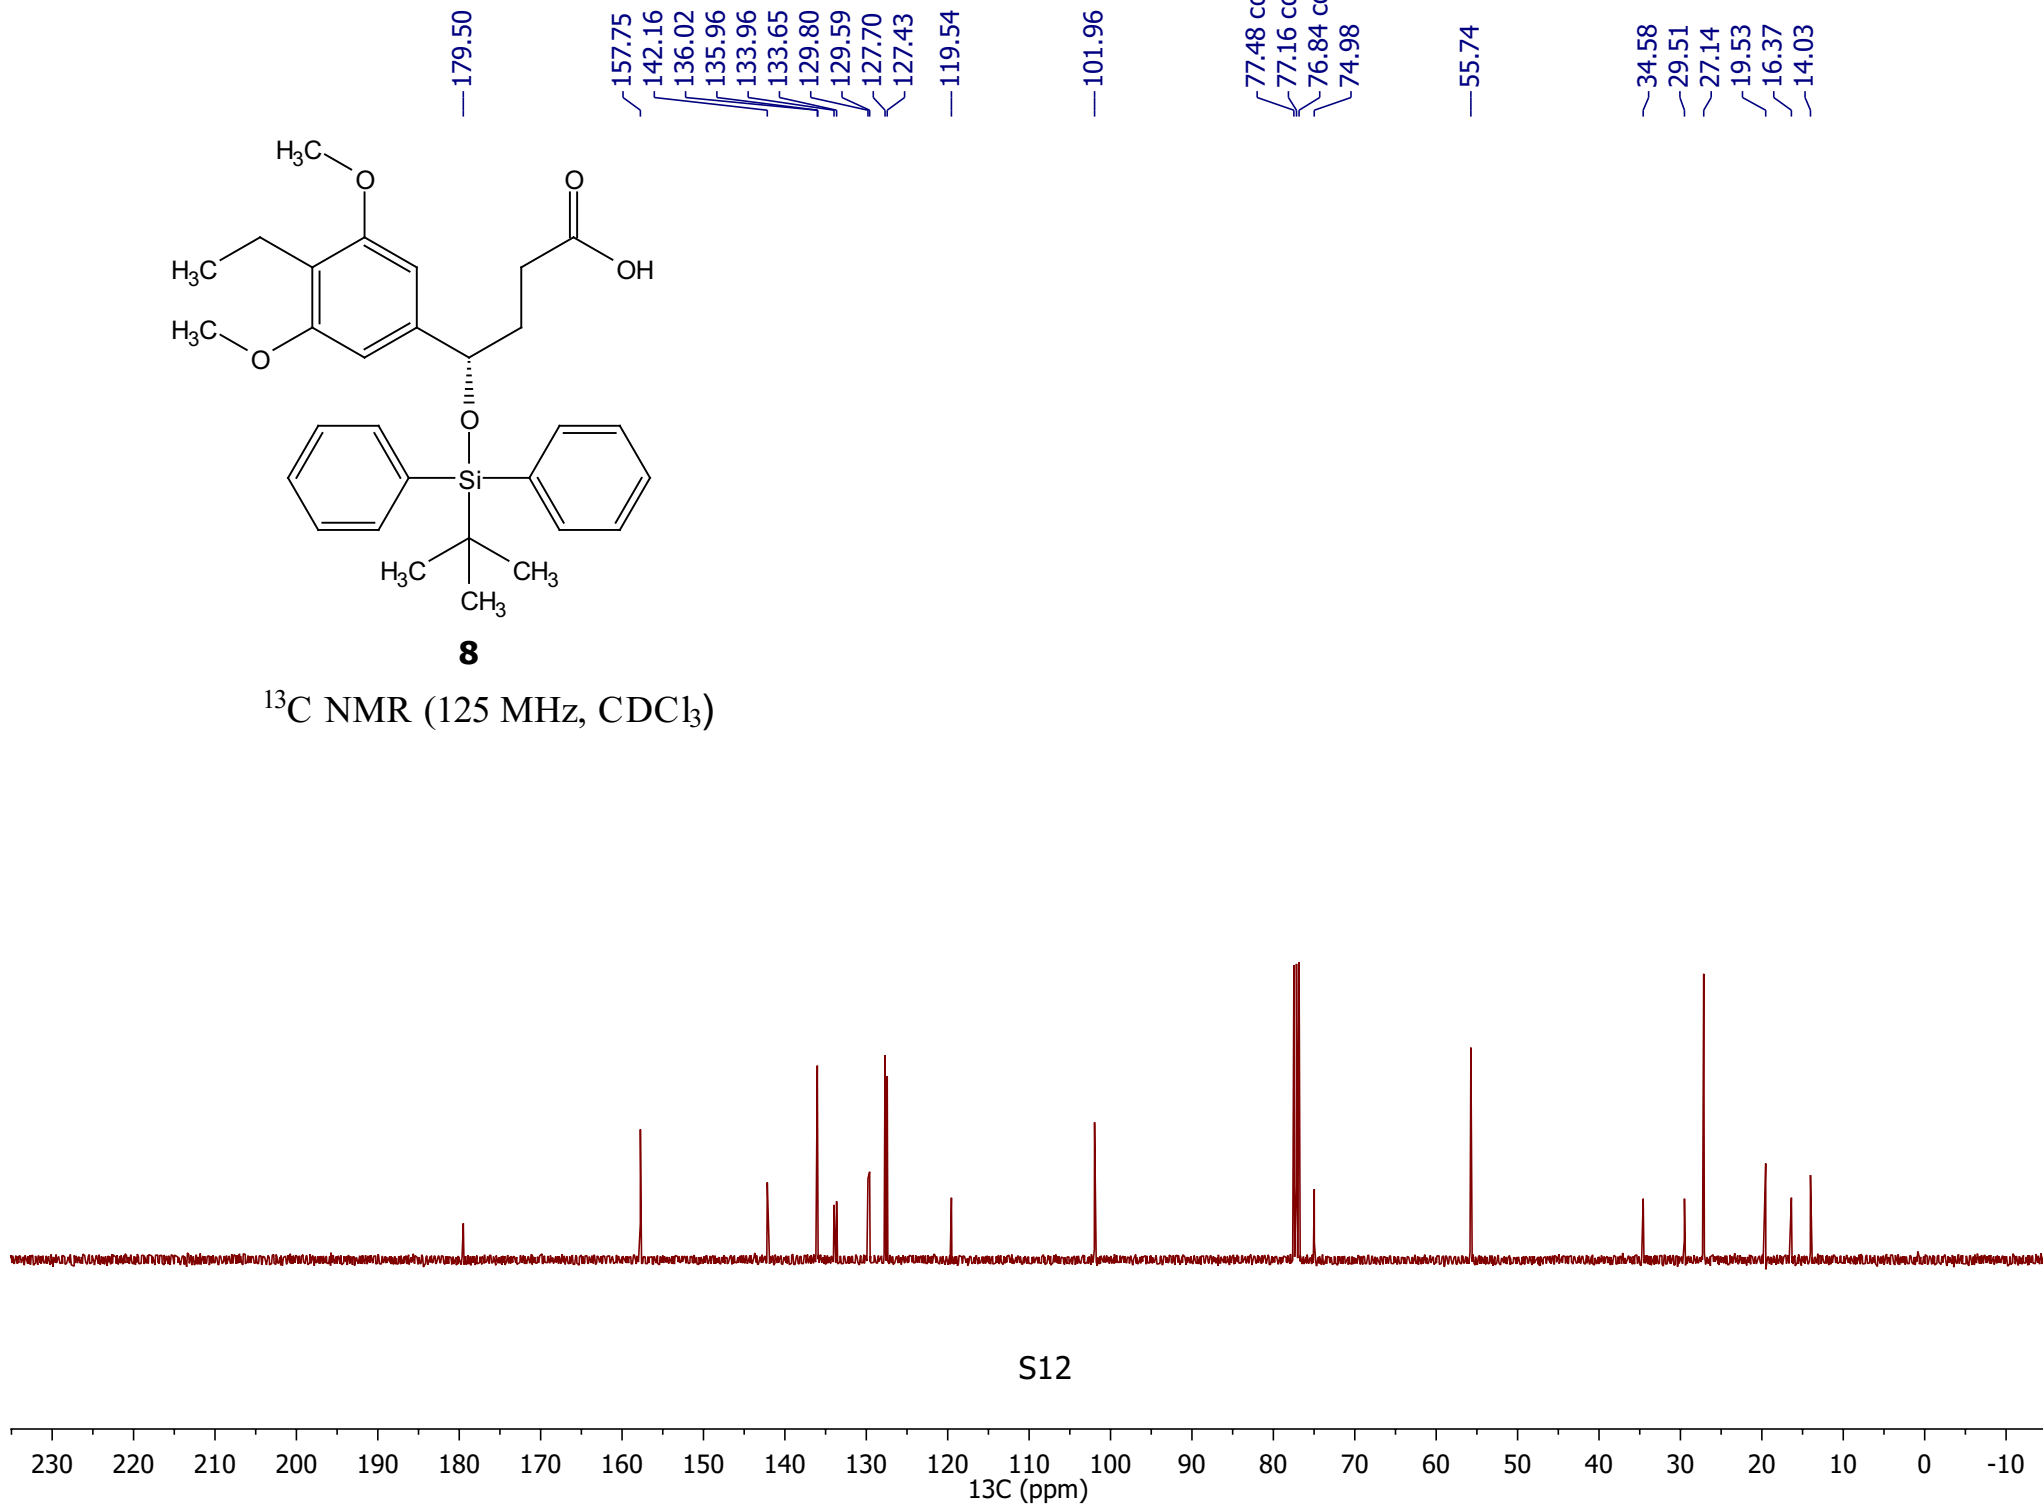

S12

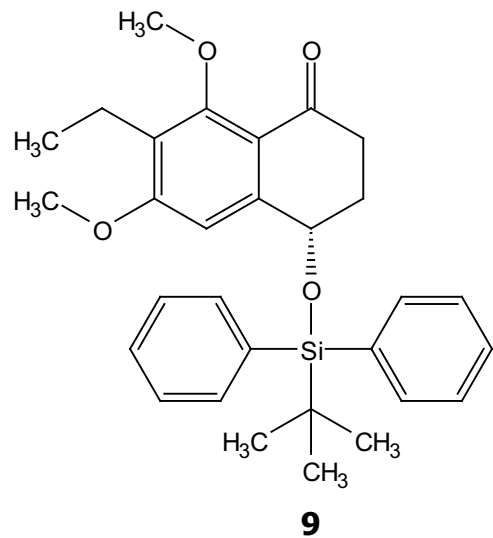

$^1\text{H}$  NMR (400 MHz,  $\text{CDCl}_3$ )

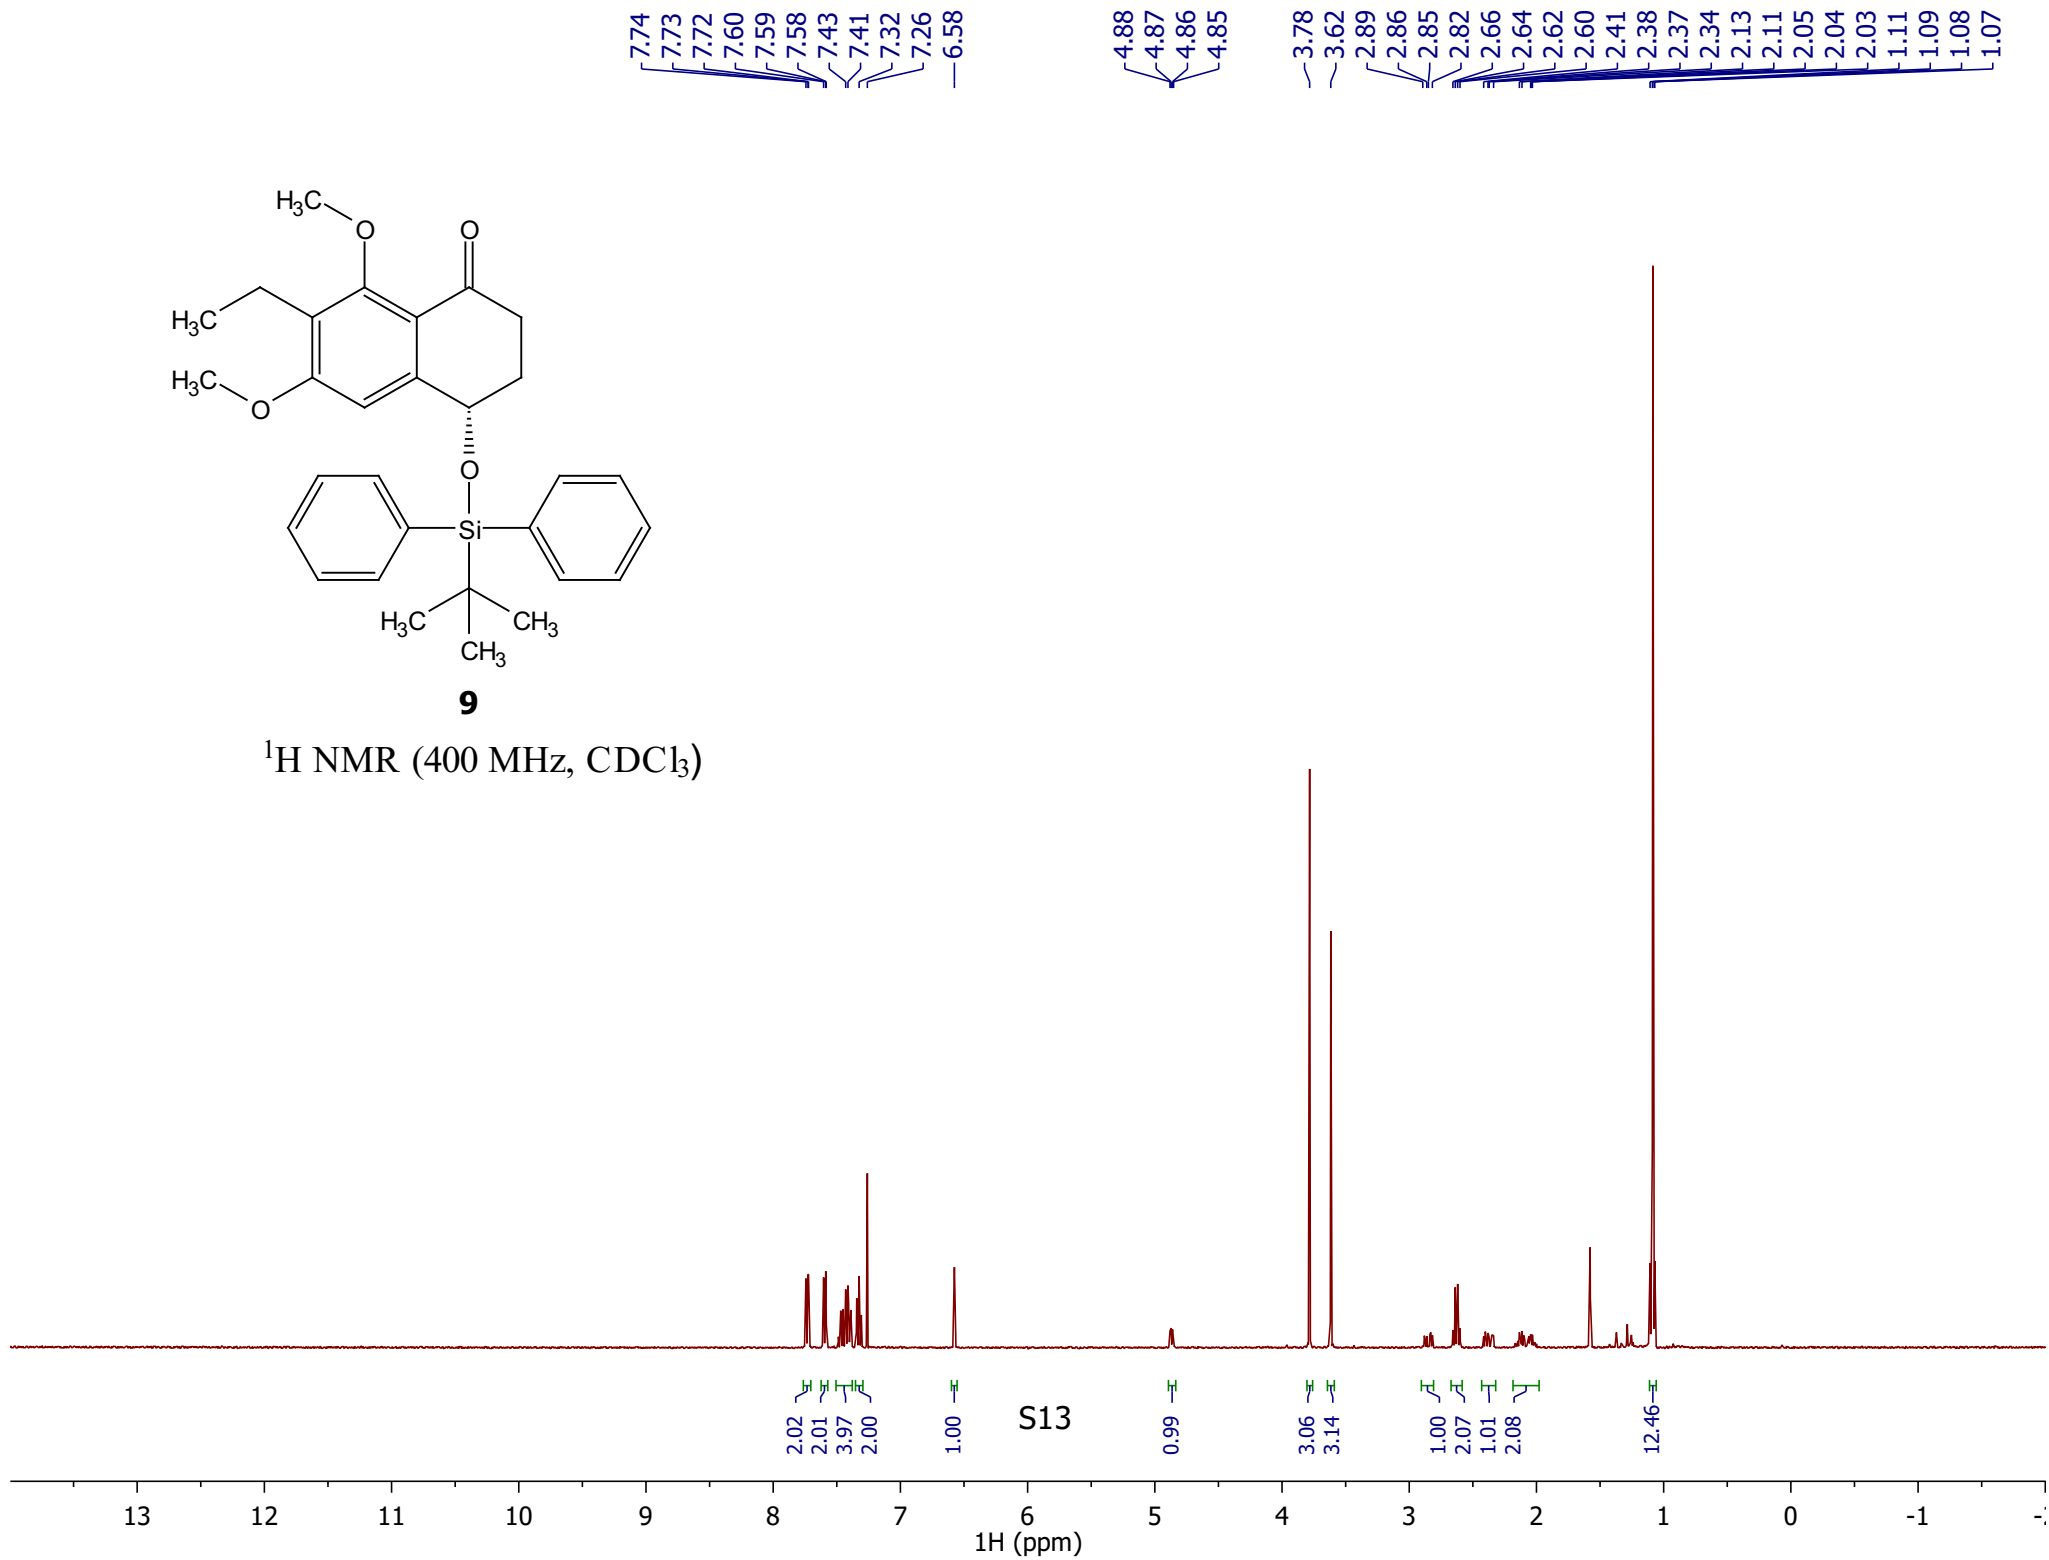

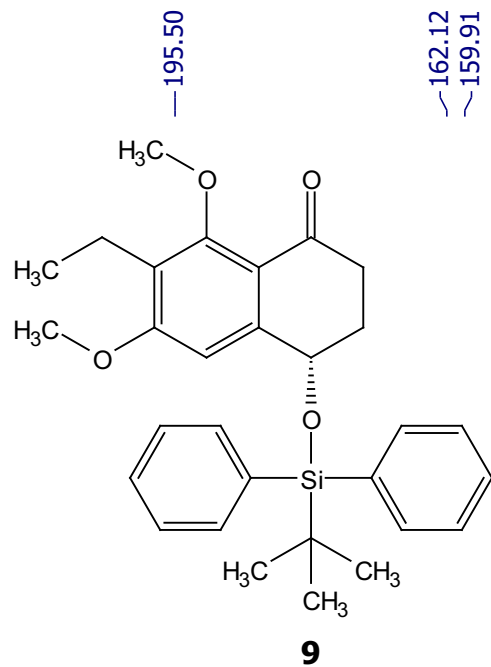

$^{13}\text{C}$  NMR (100 MHz,  $\text{CDCl}_3$ )

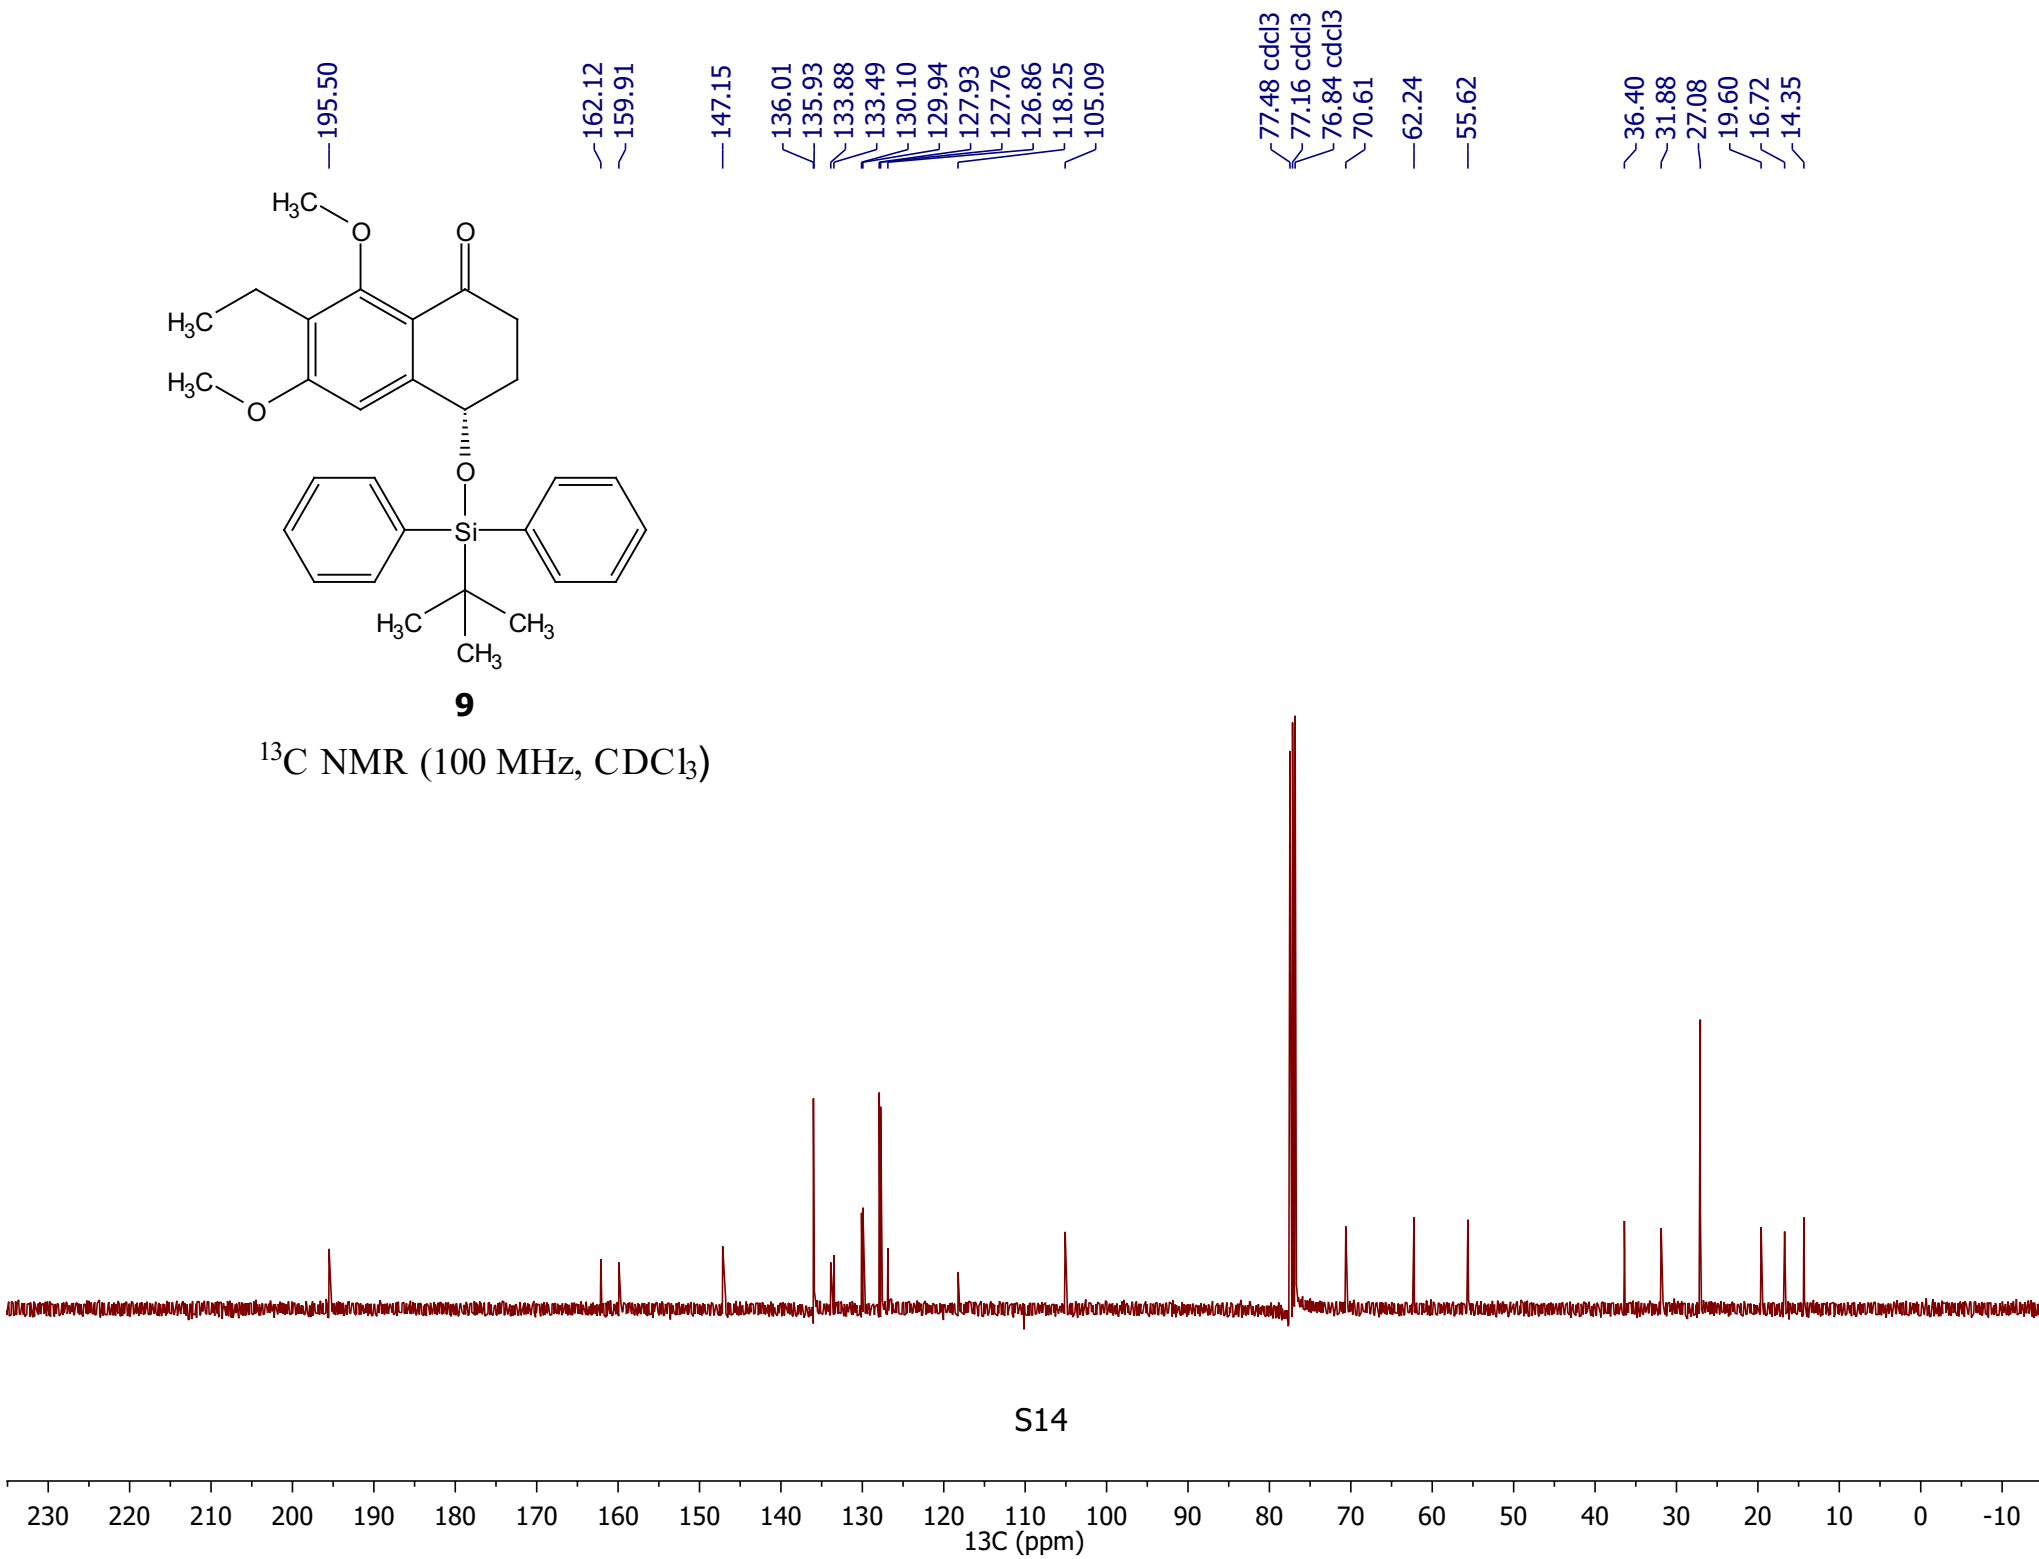

S14

—12.87

7.78  
7.76  
7.62  
7.61  
7.46  
7.44  
7.37  
7.35  
—6.34

4.91  
4.90  
4.90  
4.89

—3.63  
2.99  
2.96  
2.95  
2.93  
2.92  
2.66  
2.65  
2.63  
2.62  
2.49  
2.48  
2.47  
2.17  
2.17  
2.16  
2.09  
2.08  
1.12  
1.11  
1.10  
1.09

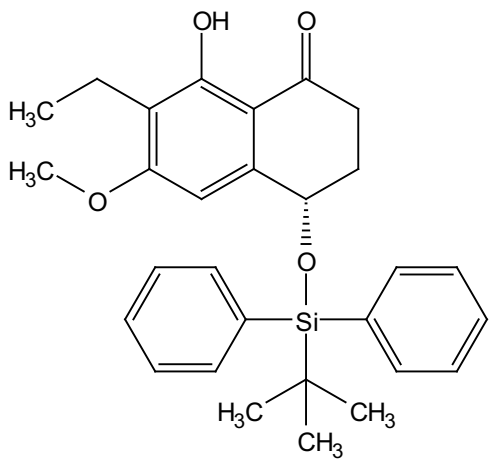

**10**

<sup>1</sup>H NMR (500 MHz, CDCl<sub>3</sub>)

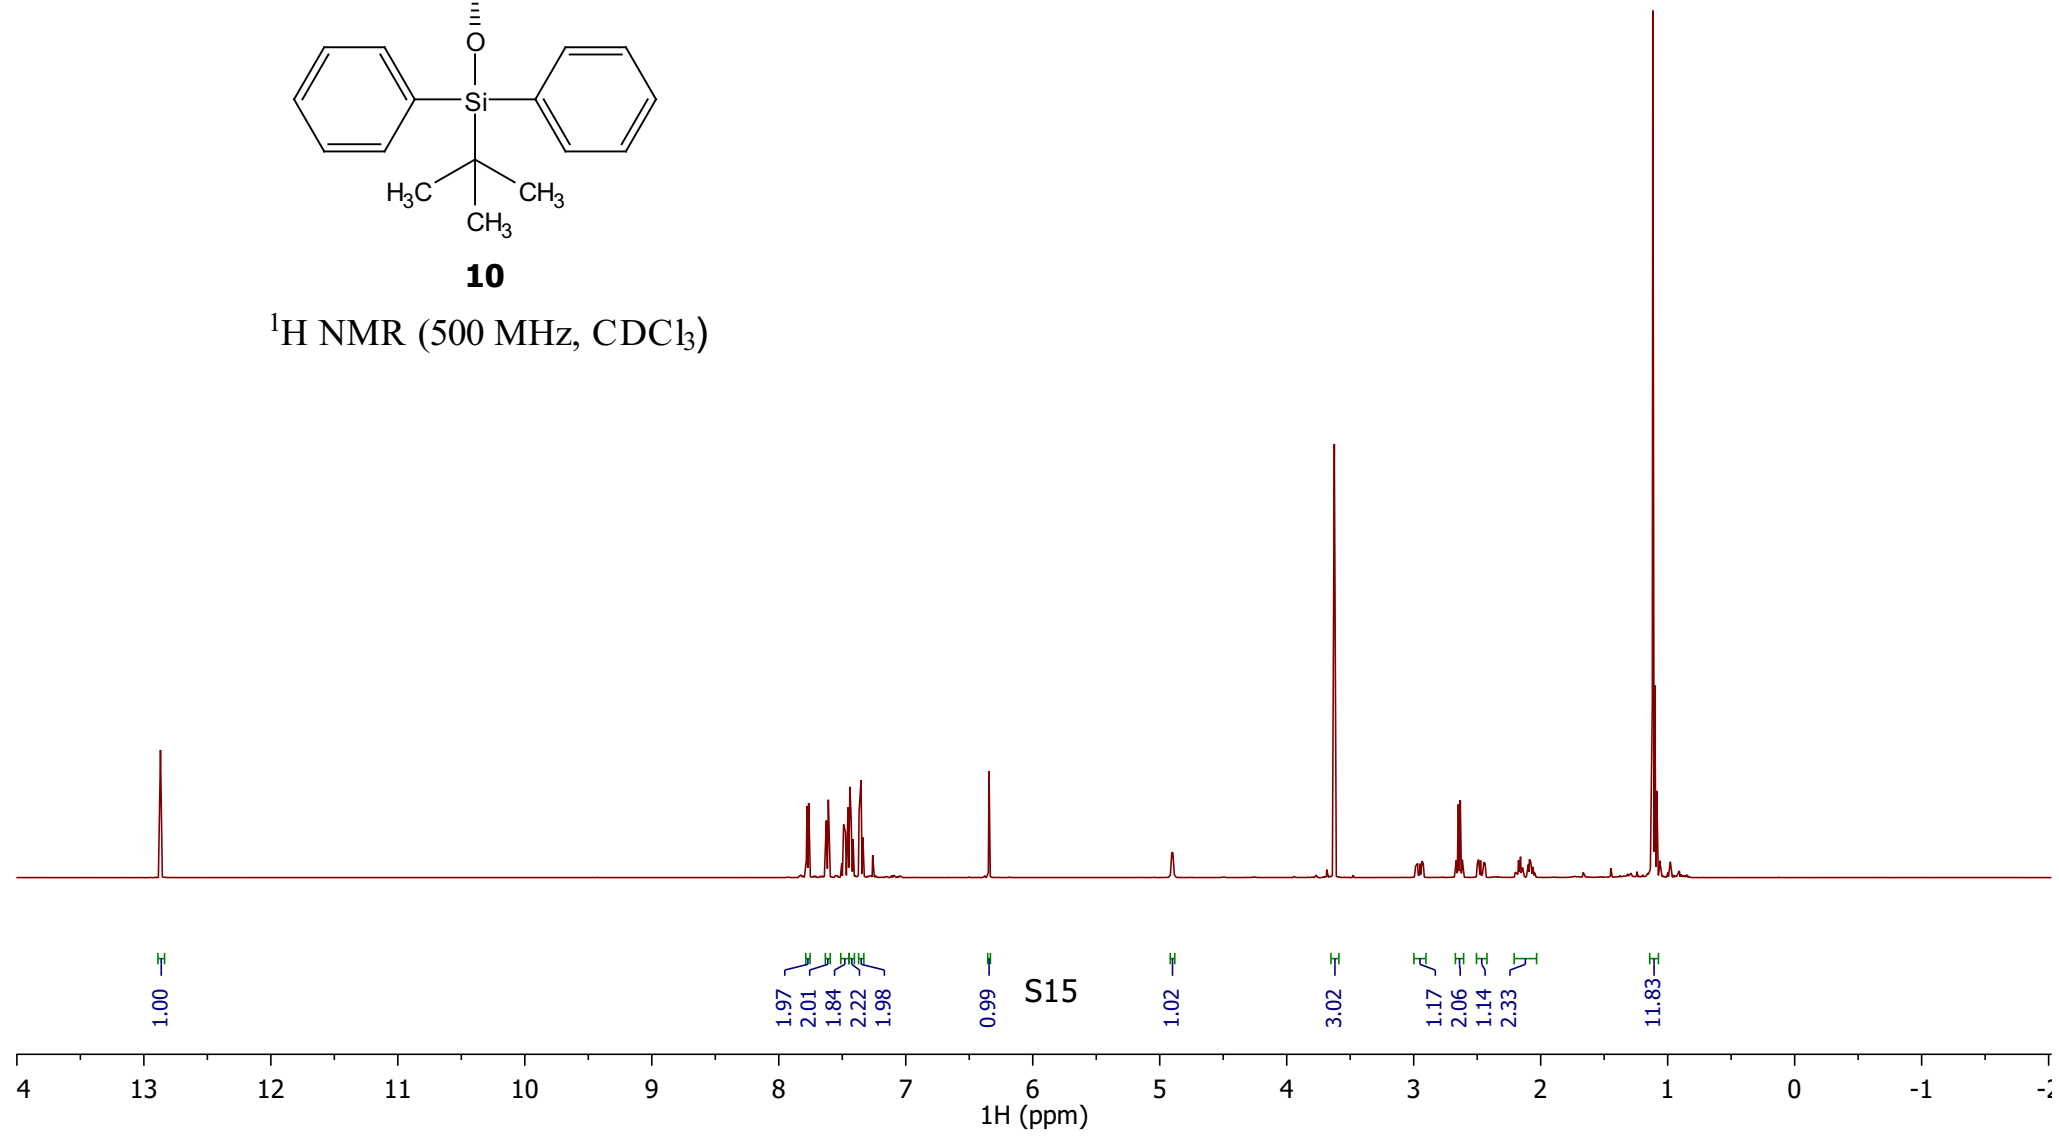

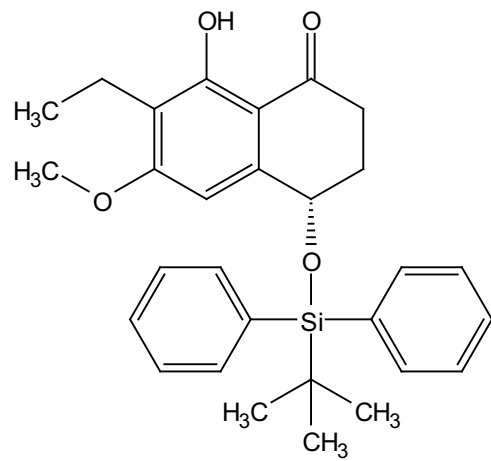

**10**

$^{13}\text{C}$  NMR (125 MHz,  $\text{CDCl}_3$ )

—202.67

~163.29  
~162.03

145.43  
135.99  
135.89  
133.77  
133.42  
130.11  
129.92  
127.94  
127.71  
—118.67

—110.14

—101.60

~77.41  
~77.16  
~76.91  
~69.91

—55.60

~34.64  
~32.03  
~27.05  
~19.57  
~15.70  
~13.34

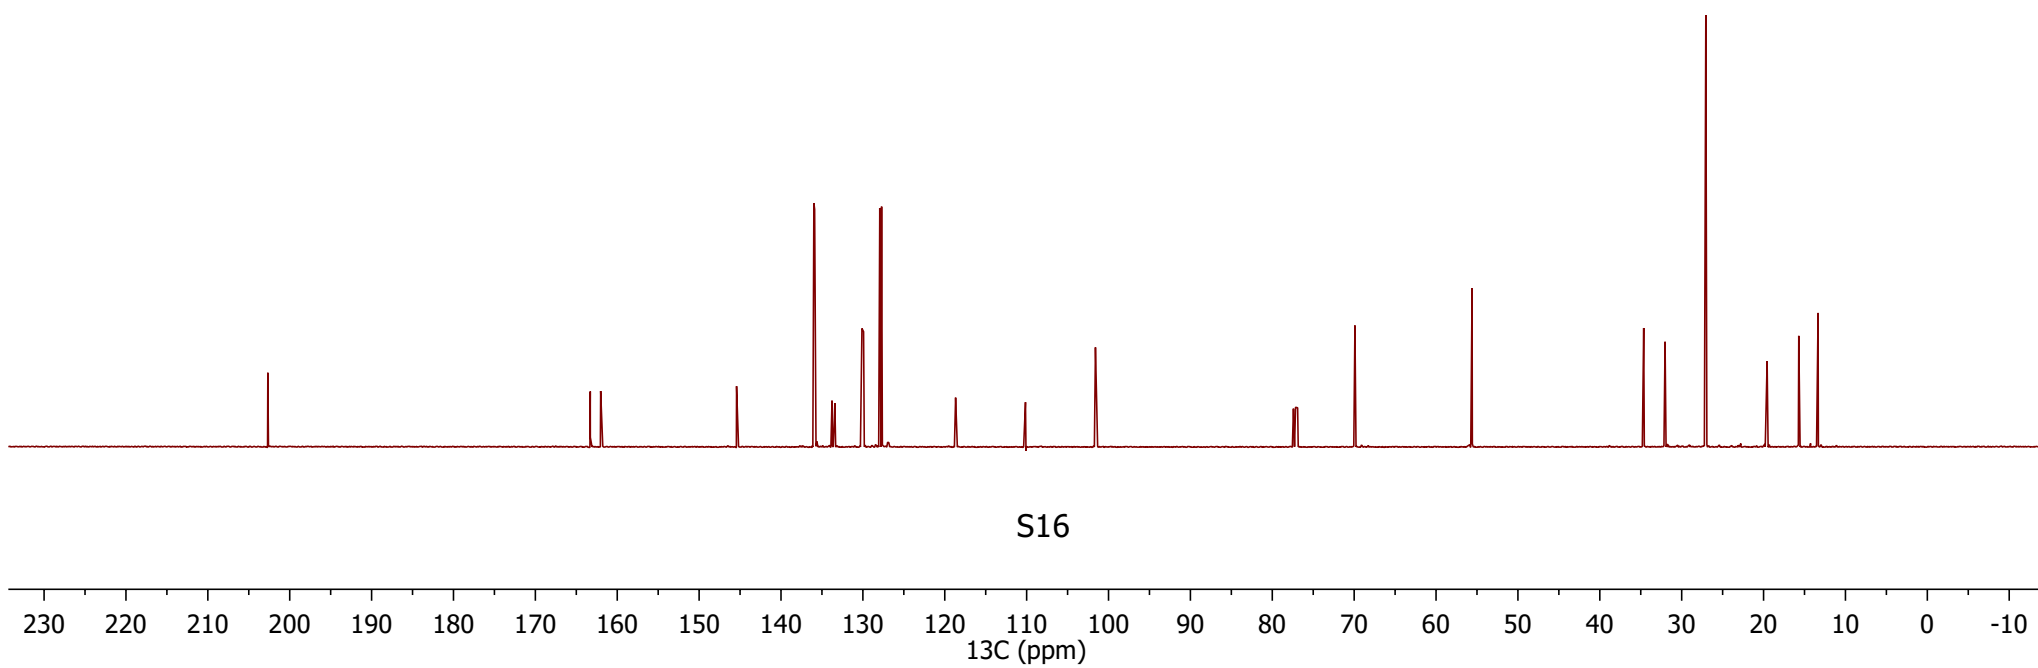

S16



—12.80

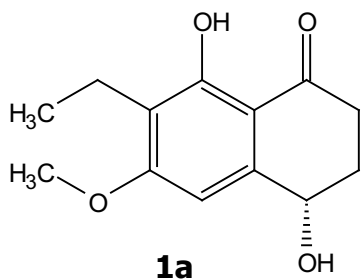

(+)-*O*-Methylasparvenone

$^1\text{H}$  NMR (500 MHz,  $\text{CDCl}_3$ )

—7.26  $\text{cdCl}_3$

—6.63

4.84  
4.83  
4.82  
4.81  
4.81

—3.89

2.89  
2.88  
2.88  
2.87  
2.85  
2.85  
2.84  
2.83  
2.65  
2.63  
2.62  
2.61  
2.60  
2.58  
2.57  
2.31  
2.29  
2.27  
2.10  
1.08  
1.06  
1.05

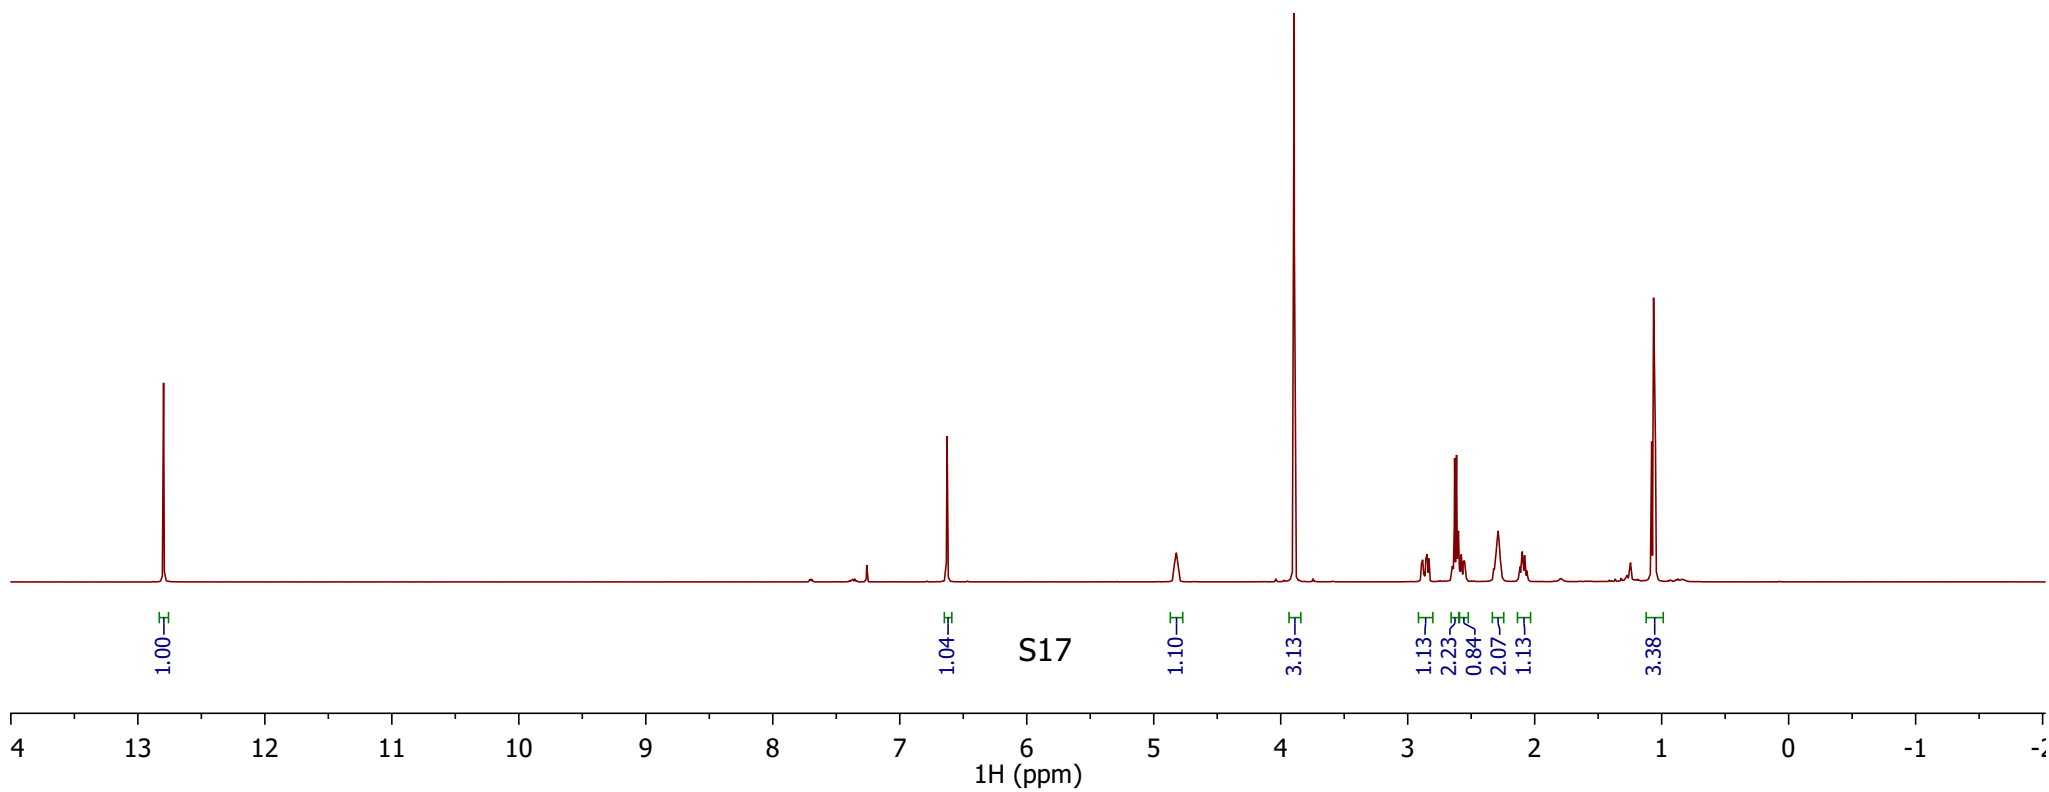

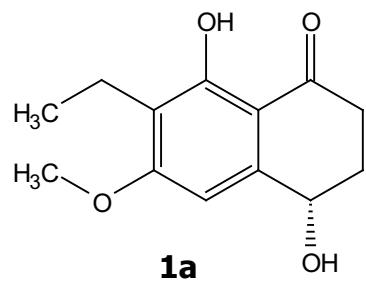

(+)-*O*-Methylasparvenone

$^{13}\text{C}$  NMR (125 MHz,  $\text{CDCl}_3$ )

—202.45

—163.78  
—162.05

—145.63

—119.11

—110.00

—100.62

—77.41  $\text{cdCl}_3$   
—77.16  $\text{cdCl}_3$   
—76.91  $\text{cdCl}_3$   
—68.29

—55.88

—34.75  
—31.82

—15.70  
—13.26

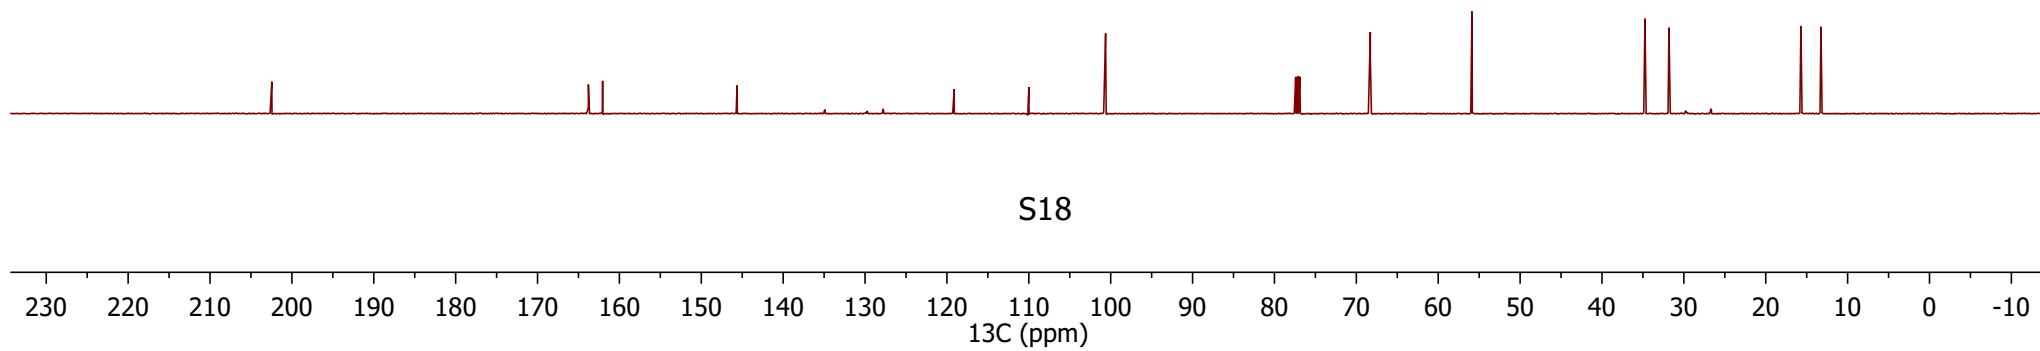

## Chiral HPLC Traces

Chiral HPLC trace of (*R*)-methyl 4-(4-ethyl-3,5-dimethoxyphenyl)-4-hydroxybut-2-ynoate (**5**), 94 % ee

CHIRALCEL OJ-H, 250 X 4.6 mm, 5  $\mu$ m Daicel

Eluent = n-hex.: *iso*-propanol = 90:10, 1 mL/min,  $\lambda$  235.16 nm

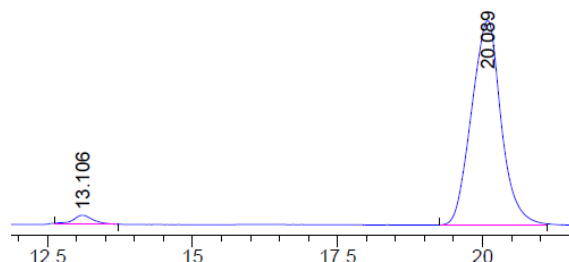

| Peak #   | RetTime [min] | Type | Width [min] | Area [mAU*s] | Height [mAU] | Area %  |
|----------|---------------|------|-------------|--------------|--------------|---------|
| 1        | 13.106        | BBA  | 0.3574      | 375.88654    | 15.26108     | 2.9578  |
| 2        | 20.089        | BBA  | 0.5442      | 1.23326e4    | 347.35394    | 97.0422 |
| Totals : |               |      |             | 1.27085e4    | 362.61502    |         |

**Figure S1.** Determination of enantiomeric excess via chiral HPLC of (+)-(*R*)-**5** 94% ee ((-)-(*S*)-**5**  $t_{R}$ =13.11 min, (+)-(*R*)-**5**  $t_{R}$ =20.09 min)

Chiral HPLC trace of (+)-*O*-Methylasparvenone (**1a**), 94 % ee

ChiralPAK AD-H, 250 X 4.6 mm, 5  $\mu$ m Daicel

Eluent = n-hex.: *iso*-propanol = 90:10, 1 mL/min,  $\lambda$  235.16 nm

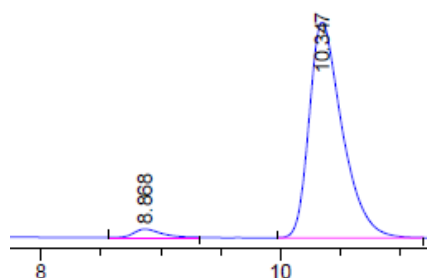

| Peak #   | RetTime [min] | Type | Width [min] | Area [mAU*s] | Height [mAU] | Area %  |
|----------|---------------|------|-------------|--------------|--------------|---------|
| 1        | 8.868         | BB   | 0.2358      | 360.55624    | 22.63946     | 3.1565  |
| 2        | 10.347        | BB   | 0.2889      | 1.10622e4    | 579.07874    | 96.8435 |
| Totals : |               |      |             | 1.14227e4    | 601.71819    |         |

**Figure S2.** Determination of enantiomeric excess via chiral HPLC of (+)-(*S*)-**1a** 94% ee ((-)-(*R*)-**1a**  $t_{R}$ =8.87 min, (+)-(*S*)-**1a**  $t_{R}$ =10.35 min)
